# Supplementary material for: Hydrological soil properties control tree regrowth after forest disturbance in the forest steppe of central Mongolia
Source: Copernicus journal article supplement (doi:10.5194/soil-7-563-2021), 2021-08-30
Supplement: Supplementary file 1 [file soil-7-563-2021-supplement.zip]

Archive with 4 entries (4 files):
- soil-7-563-2021-supplement-title-page.pdf
- Table_S1.xlsx
- Figure_S1.pdf
- data.xlsx
