# Supplementary material for: Hydrological soil properties control tree regrowth after forest disturbance in the forest steppe of central Mongolia
Source: Copernicus journal article supplement (doi:10.5194/soil-7-563-2021), 2021-08-30
Supplement: Supplementary file 1 [file soil-7-563-2021-supplement.zip › data.xlsx]

## Sheet: Tabelle1
Sample_ID	Profile_ID	Group	Depth from	Depth until	Horizon	Parent material	Bedrock	Borders	Rock fragments	Soil structure	Roots	Soil color	Coordinates N	Coordinates N	Coordinates E	Coordinates E	Exposition	Elevation	Inclination	Skeleton content	Skeleton content	Bulk density	pH	Carbonate content	Clay content	Silt content	Sand content	Al exchangable	Ca exchangable	K exchangable	Na exchangable	Mg exchangable	Mn exchangable	Fe exchangable	H exchangable	ECEC	Bases	Acidifier	Base saturation	C_org	N_tot	Al exchangable	Ca exchangable	K exchangable	Na exchangable	Mg exchangable	Mn exchangable	Fe exchangable	H exchangable
			[cm]	[cm]				[distinctness / topography]	[size / shape / weatheing]	[typ / size]	[fine / coarse]		[°]	[']	[°]	[']	[°]	[m a.s.l.]	[%]	[mass %]	[volume %]	[g/cm³]	[1M KCl]	[eq %]	[%]	[%]	[%]	[mmol/kg]	[mmol/kg]	[mmol/kg]	[mmol/kg]	[mmol/kg]	[mmol/kg]	[mmol/kg]	[mmol/kg]	[mmolc/kg]	[mmol/kg]	[mmol/kg]	[%]	[%]	[%]	[g/m²]	[g/m²]	[g/m²]	[g/m²]	[g/m²]	[g/m²]	[g/m²]	[g/m²]
P-01-01-01	1	FOR	140	165	2 Cw 3	slope deposit solifluction	granite	- / -	F, M, C, S / A, S / W, S	SG	N / N	10YR 5/4	48	38.681	98	22.141	320	1915	24.5	40	22.6415	1.5	8.09153	0.818964	3.5314	6.2186	90.25	0.127329	101.547	1.63024	0.351607	4.41004	0.146639	0.044066	0	108.257	107.939	0.318033	99.7062	0.00609033	0.0216465	0.772991	915.709	14.3414	1.81876	24.1168	1.81261	0.553695	0
P-01-01-02	1	FOR	115	140	2 Cw 3	slope deposit solifluction	granite	- / -	F, M, C, S / A, S / W, S	SG	N / N	10YR 5/4	48	38.681	98	22.141	320	1915	24.5	40	22.6415	1.5	7.69267	0.624874	3.52194	4.86806	91.61	0.165121	33.6977	1.58857	0.345695	3.854	0.0224148	0.0563072	0	39.7298	39.486	0.243843	99.3862	0	0.0270673	1.00242	303.871	13.9748	1.78818	21.0761	0.277071	0.707507	0
P-01-01-03	1	FOR	100	115	2 Cw 2	slope deposit solifluction	granite	G / S	F, M, C, S / A, S / W, S	SG	V / N	10YR 5/4	48	38.681	98	22.141	320	1915	24.5	30	16.3571	1.44488	6.90267	0	2.75519	5.37481	91.87	0.27835	43.5405	1.43187	0.452146	3.47147	0.0338687	0.130121	0	49.3383	48.896	0.44234	99.1035	0.172776	0.0279954	1.13941	264.741	8.49342	1.57701	12.8006	0.282288	1.10243	0
P-01-01-04	1	FOR	80	100	2 Cw 2	slope deposit solifluction	granite	C / S	F, M, C / S / S	SG	V / N	10YR 5/4	48	38.681	98	22.141	320	1915	24.5	4.8395	2.77057	1.5171	6.59267	0	1.88047	2.85953	95.26	0.254544	35.3277	1.45223	0.338024	3.54763	0.0365969	0.0829932	0	41.0397	40.6656	0.374134	99.0884	0.154549	0.0233676	1.98303	408.811	16.3944	2.2438	24.8963	0.580521	1.33822	0
P-01-01-05	1	FOR	60	80	Cw 1	slope deposit with aeolian sand	granite	C / S	F, M, C / S / S	SG	V / N	10YR 5/4	48	38.681	98	22.141	320	1915	24.5	2.86075	1.60604	1.48772	6.11816	0	4.44084	7.56916	87.99	0.56965	36.5822	1.7773	0.546154	4.41709	0.0789818	0.180231	0	44.1516	43.3228	0.828863	98.1227	0.233961	0.0244905	4.44243	423.762	20.0847	3.62908	31.0297	1.25414	2.90911	0
P-01-01-06	1	FOR	37	60	BC	slope deposit with aeolian sand	granite	C / S	F, M, C / S / S	SG, SB / FI	V / V	10YR 5/4	48	38.681	98	22.141	320	1915	24.5	5.77414	3.08679	1.41666	5.42359	0	6.54109	7.51891	85.94	0.575202	46.4151	2.66348	0.583901	7.48761	0.201579	0.148122	0	58.0749	57.15	0.924904	98.4074	0.395337	0.0312005	4.76486	571.121	31.9721	4.12133	55.873	3.40002	2.53962	0
P-01-01-07	1	FOR	7	37	Bw	slope deposit with aeolian sand	granite	C / W	F / S / W	SB / ME	F / V	10YR 4/4	48	38.681	98	22.141	320	1915	24.5	3.83453	2.01057	1.38948	4.74474	0.876002	11.9374	11.3026	76.76	0.876104	46.4539	2.93097	0.210295	10.6228	0.264023	0.181897	0	61.5399	60.2179	1.32202	97.8518	0.388771	0.0358383	9.47577	746.313	45.9369	1.93801	103.497	5.81443	4.07196	0
P-01-01-08	1	FOR	0	7	Ah/AB	slope deposit with aeolian sand	granite	C / S	- / - / -	SB, GR / FI, ME	F / F	10YR 3/4	48	38.681	98	22.141	320	1915	24.5	1.60694	0.788312	1.3	4.41428	0.587981	14.8533	21.0467	64.1	4.70559	111.227	4.07606	0.218028	21.6593	3.85944	0.746066	0.496117	146.987	137.18	9.80721	93.3279	3.98543	0.210924	11.368	399.137	14.2693	0.448801	47.1353	18.9847	3.7305	0.0447766
P-01-02-00	2	FOR	110	140	2 Cw 3	slope deposit solifluction	granite	- / -	F, M, C, S / S, A / S	SG, MA	N / N	2.5YR 4/3	48	38.7	98	22.034	340	1907	26.5	50	26.4151	1.4	8.03988	2.91625	7.01397	5.99603	86.99	0.104207	286.692	1.81041	0.459478	8.57432	0.193401	0.0461854	0	297.88	297.536	0.343793	99.8846	0.117684	0.0163572	0.590447	2412.91	14.8647	2.21829	43.7637	2.23126	0.541636	0
P-01-02-01	2	FOR	100	110	Cw 2	slope deposit with aeolian sand	granite	C / S	F, M, C, S / S / W	SG	V / N	10YR 4/4	48	38.7	98	22.034	340	1907	26.5	20	10.566	1.4	8.14267	0.955657	4.38146	6.42854	89.19	0.165321	243.009	1.39916	0.584884	7.0759	0.0948309	0.0830948	0	252.413	252.069	0.343246	99.864	0.267596	0.0186453	0.499587	1090.81	6.12692	1.50599	19.2617	0.5835	0.519728	0
P-01-02-02	2	FOR	80	100	Cw 1	slope deposit with aeolian sand	granite	C / S	F, M, C, S / S / W	SG	V / V	7.5YR 4/4	48	38.7	98	22.034	340	1907	26.5	0.454282	0.239998	1.4	7.97359	0.155025	3.01924	10.5708	86.41	0.206648	83.6802	1.2957	0.291726	6.23671	0.0396995	0.15762	0	91.9083	91.5044	0.403967	99.5605	0.241687	0.0255859	1.5541	934.78	14.1202	1.86935	42.2505	0.607909	2.45344	0
P-01-02-03	2	FOR	62	80	Cw 1	slope deposit with aeolian sand	granite	C / S	- / - / -	SG	V / V	7.5YR 4/4	48	38.7	98	22.034	340	1907	26.5	0.835196	0.441236	1.4	7.23267	0	4.57096	9.99904	85.43	0.316874	62.366	1.35829	0.36428	5.40519	0.0426651	0.191017	0	70.0443	69.4937	0.550556	99.214	0.347017	0.0341972	2.13654	624.614	13.2711	2.09281	32.8296	0.585738	2.66572	0
P-01-02-04	2	FOR	41	62	BC/Ah	slope deposit with aeolian sand	granite	G / W	- / - / -	SG, SB / FI	V / V	10YR 4/4	48	38.7	98	22.034	340	1907	26.5	1.56991	0.809057	1.36568	7.20359	0.0692777	9.73822	12.1218	78.14	0.515439	109.943	1.44923	1.00166	9.5033	0.173605	0.296755	0	122.883	121.898	0.985799	99.1978	0.648903	0.0431025	3.9259	1243.86	15.9952	6.50056	65.2028	2.69235	4.6782	0
P-01-02-05	2	FOR	14	41	Bw/Ah	slope deposit with aeolian sand	granite	G / W	- / - / -	SG, SB / FI, ME	V / V	10YR 3/4	48	38.7	98	22.034	340	1907	26.5	1.38207	0.646038	1.23872	6.23359	0.183708	15.9621	18.3079	65.73	0.414216	104.292	1.7327	0.583547	9.56023	0.251998	0.251619	0	117.086	116.168	0.917833	99.2161	0.812655	0.0495442	3.68626	1378.63	22.3447	4.42491	76.6402	4.56628	4.63468	0
P-01-02-06	2	FOR	7	14	Bw	slope deposit with aeolian sand	granite	C / W	- / - / -	SB / ME	F / V	10YR 3/4	48	38.7	98	22.034	340	1907	26.5	0.783596	0.33283	1.12558	4.88816	0.502578	8.10436	15.6056	76.29	0.788569	85.1255	2.14736	0.356336	15.5587	0.54813	0.319166	0	104.844	103.188	1.65586	98.4206	0.862528	0.0675375	1.66327	266.7	6.56326	0.640401	29.5616	2.35404	1.39334	0
P-01-02-07	2	FOR	0	7	Ah/AB	slope deposit with aeolian sand	granite	A / W	- / - / -	GR, SB / FI, ME	C / C	7.5YR 3/2	48	38.7	98	22.034	340	1907	26.5	1.13796	0.45089	1.05	4.95816	0.625119	19.1779	25.7821	55.04	1.17876	189.535	3.24587	0.337424	41.9025	4.37428	0.415963	0	240.99	235.021	5.96901	97.5231	6.21479	0.362199	2.31105	551.967	9.22159	0.563675	74.0035	17.4621	1.68793	0
P-01-03-00	3	STE	65	90	Cw	slope deposit with parent material	granite	- / -	C, S / F, A / S	SG	V / N	10YR 4/4	48	38.929	98	22.122	301	1882	28.5	95	57.3585	1.6	6.29359	0.271324	1.88784	3.64216	94.47	0.383077	58.3805	0.709544	0.624423	9.06423	0.0359148	0.170268	0	69.368	68.7787	0.58926	99.1505	0.666758	0.06979	0.20672	46.7955	0.554839	0.287107	4.40612	0.0394617	0.190172	0
P-01-03-01	3	STE	35	65	Cw	slope deposit with parent material	granite	G / W	C, S / F, A / S	SG	V / N	10YR 4/4	48	38.929	98	22.122	301	1882	28.5	95	57.3585	1.6	5.07497	0.161896	5.70576	8.52424	85.77	0.793336	75.0894	1.06729	1.07855	15.8785	0.0349018	0.134279	0	94.0762	93.1137	0.962517	98.9769	0.586132	0.0609785	0.51373	72.2264	1.0015	0.595095	9.26223	0.0460184	0.179971	0
P-01-03-02	3	STE	20	35	Bw	slope deposit with parent material	granite	G / W	F, M / A / S	SG, SB / VF	F / V	10YR 3/4	48	38.929	98	22.122	301	1882	28.5	40	21.1321	1.4	5.07015	0.537739	9.17353	11.3565	79.47	0.826157	88.1773	1.05899	0.653433	18.7548	0.0502355	0.142518	0	109.663	108.644	1.01891	99.0709	1.26339	0.112549	2.80866	445.28	5.21699	1.89281	57.4351	0.34774	1.00282	0
P-01-03-03	3	STE	0	20	Ah	slope deposit with parent material	granite	A / S	F / A / S	SG, SB / ME	C / V	10YR 2/2	48	38.929	98	22.122	301	1882	28.5	9.25623	3.88755	1.11298	4.92896	0.488895	13.6847	15.4153	70.9	0.657873	127.755	1.31098	0.60806	27.1106	0.582983	0.146321	0	158.172	156.785	1.38718	99.123	2.81335	0.246156	3.58544	1034.23	10.3535	2.82368	133.097	6.46939	1.65054	0
P-01-04-00	4	STE	80	90	2 Cw 2	slope deposit with aeolian sand	granite	- / -	F, M, C, S / A / W	GR, SG / FI	N / N	10YR 5/4	48	38.377	98	22.202	292	1917	25.75	60	36.2264	1.6	7.99988	3.13869	5.04807	10.2219	84.73	0.165686	370.019	1.51603	0.817389	12.7838	0.0604019	0.0844016	0	385.447	385.137	0.31049	99.9194	0.388962	0.0354402	0.28611	949.097	3.79354	1.20266	19.8854	0.212375	0.301658	0
P-01-04-01	4	STE	60	80	2 Cw	slope deposit with aeolian sand	granite	G / W	S, F, M, C / F, A / W, S	SG	N / N	10YR 5/4	48	38.377	98	22.202	292	1917	25.75	60	36.2264	1.6	8.01954	1.99531	5.48061	10.3994	84.12	0.354377	307.446	1.86262	0.40989	12.0186	0.0679099	0.115518	0	322.275	321.737	0.537804	99.8331	0.28838	0.031342	1.22389	1577.19	9.32166	1.20618	37.3904	0.477547	0.825741	0
P-01-04-02	4	STE	35	60	2 BC	slope deposit with aeolian sand	granite	G / W	S, F, M, C / F, A / W, S	SB, SG / FI	V / N	10YR 5/4	48	38.377	98	22.202	292	1917	25.75	9.65798	5.46678	1.5	6.39497	0.182044	6.27118	7.18882	86.54	0.212257	41.1407	2.40367	0.194434	10.5619	0.0579725	0.0578245	0	54.6288	54.3007	0.328054	99.3995	0.315979	0.0391924	1.94021	558.597	31.8386	1.51436	86.9682	1.07899	1.094	0
P-01-04-03	4	STE	24	35	Bw/Ah	colluvium	granite	C / W	F-S / A / W	SB, SG / ME	F / N	10YR 4/4	48	38.377	98	22.202	292	1917	25.75	3.32142	1.67698	1.33798	6.02359	0	7.70711	9.15289	83.14	0.255417	60.01	1.83724	0.286515	14.4877	0.0430525	0.0745156	0	76.9945	76.6215	0.372985	99.5156	0.662716	0.0679319	0.980592	342.218	10.2211	0.937249	50.1035	0.336545	0.592112	0
P-01-04-04	4	STE	0	24	Ah	colluvium	granite	C / S	F / A / W	SB, GR / ME, CO	C / V	10YR 3/3	48	38.377	98	22.202	292	1917	25.75	2.57714	1.11321	1.14468	5.63954	0	10.282	11.588	78.13	0.26857	93.1654	1.5815	0.429582	19.6558	0.120413	0.0674442	0	115.289	114.832	0.456427	99.6041	1.766	0.166741	1.93945	999.348	16.5495	2.64324	127.862	1.77052	1.00806	0
P-01-05-01	5	STE	85	110	3 Ck 2	slope deposit solifluction	granite	- / -	F-S / A / W, S	SG	N / N	2.5Y 5/3	48	38.736	98	21.853	307	1851	20	90	54.3396	1.6	9.14015	0.936191	3.17656	4.20344	92.62	0.134332	250.384	0.981157	2.1555	8.69193	0.0177618	0.0755353	0	262.44	262.213	0.227629	99.9133	0.113658	0.0101865	0.144979	401.396	1.53446	1.98218	8.45029	0.039032	0.168731	0
P-01-05-02	5	STE	59	85	2 Ck 1	slope deposit with aeolian sand	granite	C / S	F-C / A / W, S	MA, SG	V / N	10YR 5/4	48	38.736	98	21.853	307	1851	20	30	18.1132	1.6	8.16713	8.97222	11.5964	11.1736	77.23	0.385397	445.081	1.12935	0.877219	12.2587	0.0330758	0.150673	0	459.916	459.346	0.569146	99.8762	0.45639	0.0366228	3.02807	5194.42	12.8582	5.87266	86.7623	0.529145	2.45025	0
P-01-05-03	5	STE	30	59	2 Bw	slope deposit with aeolian sand	granite	C / W	F-C / A, S / W	SG, SB / ME	C / N	10YR 4/4	48	38.736	98	21.853	307	1851	20	15	7.92453	1.4	5.53	0.115131	9.13657	10.1634	80.7	0.484655	60.0624	1.49895	0.850483	10.6326	0.0650062	0.09697	0	73.6911	73.0445	0.646632	99.1225	0.584143	0.0548319	4.51278	830.719	20.2251	6.74754	89.1827	1.23246	1.86882	0
P-01-05-04	5	STE	0	30	Ah	colluvium	granite	A / W	F / S / W	GR / ME	C / N	10YR 2/2	48	38.736	98	21.853	307	1851	20	3.33834	1.32604	1.05262	5.01988	0.412263	16.737	17.283	65.98	0.684905	142.091	2.17005	1.15826	26.5671	2.6331	0.164439	0	175.469	171.986	3.48245	98.0153	4.22969	0.321212	5.64084	1738.28	25.8985	8.12809	197.1	44.1558	2.80309	0
P-01-06-01	6	STE	90	120	2 Cw	slope deposit with aeolian sand	granite/gneiss	- / -	F-B / A / W, S	SG	V / N	10YR 5/3	48	38.216	98	22.408	300	1979	24.5	65	36.7925	1.5	7.28713	0.0621999	5.64868	14.9913	79.36	0.262014	77.4988	1.18903	1.70792	6.81615	0.040027	0.101916	0	87.6158	87.2119	0.403957	99.5389	0.14842	0.0225685	1.11345	489.194	7.32204	6.18419	26.0925	0.346343	0.89641	0
P-01-06-02	6	STE	60	90	2 Cw	slope deposit with aeolian sand	granite/gneiss	- / -	F-B / A / W, S	SG	F / N	10YR 5/3	48	38.216	98	22.408	300	1979	24.5	65	36.7925	1.5	5.13497	0.370017	6.05802	15.512	78.43	0.390378	51.9864	1.30958	1.75066	9.51	0.0600426	0.0795243	0	65.0866	64.5567	0.529945	99.1858	0.0886311	0.0223932	1.65895	328.153	8.06439	6.33897	36.4046	0.519532	0.699463	0
P-01-06-03	6	STE	30	60	2 Cw	slope deposit with aeolian sand	granite/gneiss	- / -	F-B / A / W, S	SG	F / N	10YR 5/3	48	38.216	98	22.408	300	1979	24.5	65	36.7925	1.5	5.22474	0.270102	5.92903	7.79097	86.28	0.552816	44.0094	1.52547	2.82681	7.91514	0.0369135	0.136299	0	57.0028	56.2768	0.726028	98.7263	0.361349	0.0417879	2.34924	277.8	9.39383	10.2356	30.2994	0.319403	1.19883	0
P-01-06-04	6	STE	22	30	2 Bw	slope deposit with aeolian sand	granite/gneiss	A / W	M-B / A / W	SB, SG / ME	C / N	10YR 4/3	48	38.216	98	22.408	300	1979	24.5	25	11.3208	1.2	5.16497	0.363718	7.69177	7.83823	84.47	0.612508	49.7976	1.46939	0.595967	9.23494	0.212102	0.112782	0	62.0353	61.0979	0.937391	98.4889	0.601114	0.0579699	1.1899	143.697	4.13644	0.986484	16.1608	0.838978	0.453477	0
P-01-06-05	6	STE	0	22	Ah	colluvium	granite/gneiss	A / W	M, C / A / W	GR, SB / FI, ME	C / V	10YR 2/2	48	38.216	98	22.408	300	1979	24.5	1.74231	0.800755	1.21792	5.21	0	12.9119	14.7481	72.34	0.330897	107.98	1.6545	0.406743	19.5637	0.958508	0.0916204	0	130.986	129.605	1.38103	98.9457	2.37588	0.191761	2.35054	1139.35	17.0307	2.46186	125.186	13.8636	1.34705	0
P-01-07-01	7	FOR	75	105	2 Cw	slope deposit solifluction	granite/gneiss	- / -	F-B / A-F / W, S	SG	V / V	10YR 5/4	48	38.181	98	22.487	304	2007	31	70	42.2642	1.6	7.56988	0.101169	5.4326	7.3474	87.22	0.471605	76.093	1.20429	1.22499	5.30487	0.0373368	0.191985	0	84.528	83.8271	0.700927	99.1708	0.32165	0.0290988	1.83234	439.15	6.78033	4.05535	18.5666	0.295374	1.54389	0
P-01-07-02	7	FOR	45	75	2 Cw	slope deposit solifluction	granite/gneiss	- / -	F-B / A-F / W, S	SG	V / V	10YR 5/4	48	38.181	98	22.487	304	2007	31	50	30.1887	1.6	6.09474	0.0882338	4.00823	6.02177	89.97	0.583004	31.6903	1.44183	0.502972	7.6523	0.0503432	0.132817	0	42.0536	41.2874	0.766165	98.1781	0.182293	0.0226491	3.77528	304.82	13.5295	2.77517	44.6374	0.663781	1.78012	0
P-01-07-03	7	FOR	16	45	Bw/Ah	slope deposit with aeolian sand	granite/gneiss	G / W	F-C / A / W, S	SG, SB / FI	V / N	10YR 5/4	48	38.181	98	22.487	304	2007	31	1.60422	0.968587	1.6	5.36988	0	9.37768	11.1323	79.49	0.619051	55.5668	2.03775	0.512054	13.8999	0.258615	0.149069	0	73.0432	72.0165	1.02673	98.5943	0.580009	0.035734	7.62583	1016.75	36.375	5.37459	154.242	6.48665	3.80071	0
P-01-07-04	7	FOR	3	16	Bw	slope deposit with aeolian sand	granite/gneiss	C / W	F / A / W	GR, SB / FI, ME	F / V	10YR 4/4	48	38.181	98	22.487	304	2007	31	0.778691	0.411384	1.4	4.77988	0	15.7198	19.0402	65.24	0.794681	101.586	2.95155	0.429448	26.3852	1.22301	0.279323	0	133.649	131.352	2.29702	98.2813	1.49293	0.0936182	3.872	735.218	20.8394	1.78288	115.806	12.1333	2.81687	0
P-01-07-05	7	FOR	0	3	Ah	slope deposit with aeolian sand	granite/gneiss	C / W	- / - / -	GR / FI	F / V	10YR 3/2	48	38.181	98	22.487	304	2007	31	1.27743	0.578458	1.2	5.25954	0.154343	18.9418	25.1682	55.89	0.582045	161.201	4.46847	0.369119	42.6021	5.76186	0.200193	0	215.185	208.641	6.5441	96.9589	4.28083	0.289489	0.558138	229.612	6.2092	0.301593	36.7998	11.25	0.39733	0
P-01-08-01	8	FOR	90	120	2 Cw	slope deposit solifluction	granite/gneiss	- / -	F-B / A / W, S	SG, SB / VF	V / N	10YR 5/4	48	38.206	98	22.511	305	2022	32	75	42.4528	1.5	7.01988	0.105555	4.8589	9.0611	86.08	0.359023	61.4295	1.56739	1.50531	6.26964	0.0256753	0.144663	0	71.3012	70.7718	0.529361	99.2576	0.237886	0.025798	1.08978	276.972	6.89426	3.89325	17.1432	0.158687	0.908857	0
P-01-08-02	8	FOR	60	90	2 Cw	slope deposit solifluction	granite/gneiss	- / -	F-B / A / W, S	SG, SB / VF	V / V	10YR 5/4	48	38.206	98	22.511	305	2022	32	60	33.9623	1.5	6.81954	0.0931089	3.25392	5.94608	90.8	0.523312	51.0365	1.46987	0.975783	5.44663	0.0603818	0.180424	0	59.6929	58.9288	0.764118	98.7199	0.291164	0.0272804	2.54155	368.179	10.3445	4.03795	23.8285	0.597106	1.81364	0
P-01-08-03	8	FOR	40	60	BC/Ah	slope deposit with aeolian sand	granite/gneiss	C / S	F, M / A / W	SG, SB / ME	V / V	10YR 4/3	48	38.206	98	22.511	305	2022	32	2.66889	1.25434	1.24546	6.20359	0.0988551	10.0935	11.0965	78.81	0.493339	99.4107	1.78205	1.00977	11.5429	0.1869	0.200603	0	114.626	113.745	0.880842	99.2316	0.772949	0.0542812	3.22718	965.941	16.8923	5.62817	68.018	2.48939	2.71602	0
P-01-08-04	8	FOR	20	40	BC/Ah	slope deposit with aeolian sand	granite/gneiss	C / S	F, M / A / W	SG, SB / ME	V / V	10YR 4/3	48	38.206	98	22.511	305	2022	32	3.26173	1.55623	1.26436	5.57474	0.0768663	12.7695	13.4505	73.78	0.475945	102.853	2.33896	0.770264	14.5846	0.273374	0.169389	0	121.465	120.546	0.918708	99.2436	1.22127	0.0732308	3.14139	1008.37	22.3707	4.33185	86.7143	3.67391	2.31403	0
P-01-08-05	8	FOR	5	20	Bw	slope deposit with aeolian sand	granite/gneiss	C / W	F / A / W	SB / ME	C / V	10YR 3/4	48	38.206	98	22.511	305	2022	32	3.41976	1.60755	1.2457	4.27954	0	12.8076	18.0524	69.14	4.33849	61.1284	3.34909	0.422381	15.5715	1.99229	0.372147	0.48959	87.6638	80.4713	7.19251	91.7953	1.23025	0.0923127	21.125	442.122	23.6307	1.7524	68.2996	19.7523	3.75052	0.0890607
P-01-08-06	8	FOR	0	5	Ah	slope deposit with aeolian sand	granite/gneiss	A / W	- / - / -	GR, SB / FI, ME	C / V	10YR 3/2	48	38.206	98	22.511	305	2022	32	3.30815	1.49803	1.2	5.37	0	14.2735	22.9265	62.8	0.386274	258.447	8.65543	0.393894	72.4107	2.66304	0.116461	0	343.072	339.907	3.16578	99.0772	10.1843	0.423189	0.604648	600.922	19.633	0.525359	102.103	8.48775	0.377318	0
P-01-09-01	9	FOR	160	180	5 Cl 2	sandsheet 3	granite	- / -	F / A / W	SG	N / N	10YR 5/4	48	38.77	98	22.074	301	1868	16	0.369037	0.184775	1.32684	8.09816	1.14462	7.93207	7.02793	85.04	0.111882	58.2855	1.99135	0.702619	9.47211	0.0335207	0.00396788	0	70.601	70.4516	0.14937	99.7884	0	0.0218242	0.798119	617.603	20.5849	4.27069	60.8674	0.486887	0.0585849	0
P-01-09-02	9	FOR	140	160	5 Cl 1	sandsheet 3	granite	A / S	F / A / W	SG	N / N	10YR 5/4	48	38.77	98	22.074	301	1868	16	0.00150218	0.000761406	1.3432	8.26474	1.33472	4.91495	2.91505	92.17	0.236559	131.428	1.74369	0.610484	9.37049	0.170677	0	0	143.56	143.153	0.407236	99.7163	0	0.0161991	1.71463	1415	18.3144	3.77028	61.1818	2.5189	0	0
P-01-09-03	9	FOR	130	140	4 C	slope deposit 2 with aeolian sand	granite	A / S	F-S / A / W	SG	N / N	10YR 5/4	48	38.77	98	22.074	301	1868	16	80	45.283	1.5	8.31428	3.60006	4.83555	8.15445	87.01	0.310648	313.368	1.68152	1.76596	14.2272	0.279759	0.0140566	0	331.647	331.043	0.604463	99.8177	0	0.0129944	0.251453	376.775	1.97234	1.21797	10.3738	0.461081	0.0235498	0
P-01-09-04	9	FOR	110	130	3 Ck 3	sandsheet 2	granite	A / S	F / A / W	SG	V / N	10YR 6/3	48	38.77	98	22.074	301	1868	16	2.16511	1.03295	1.26428	8.35497	4.80866	11.8537	11.7663	76.38	0.201493	540.682	2.11212	3.09425	31.1872	0.269005	0.0530939	0	577.599	577.075	0.523592	99.9094	0.307134	0.0249662	1.34491	5360.62	20.4288	17.5978	187.516	3.65595	0.733493	0
P-01-09-05	9	FOR	100	110	2 Ck 2	sandsheet	granite	A / W	F / A / W	SG, MA	V / N	10YR 5/4	48	38.77	98	22.074	301	1868	16	20	9.12845	1.20952	8.67497	5.98866	11.3134	11.2566	77.43	0.0839332	554.458	1.84589	3.59122	39.9879	0.141374	0.0264252	0	600.135	599.883	0.251733	99.9581	0.388521	0.0269008	0.21913	2150.19	6.98341	7.98878	94.0432	0.751531	0.142793	0
P-01-09-06	9	FOR	77	100	2 Ck 1	sandsheet	granite	C / S	C, S / A / W	SB / FI	F / N	10YR 6/4	48	38.77	98	22.074	301	1868	16	20	7.98958	1.05862	8.25816	12.7789	11.9569	23.1431	64.9	0.0368556	718.28	2.31944	6.61606	53.2884	0.203783	0.0633849	0	780.808	780.504	0.304024	99.9611	0.994277	0.0610005	0.193699	5607.35	17.6644	29.6273	252.282	2.18072	0.68949	0
P-01-09-07	9	FOR	67	77	2 ACk	sandsheet	granite	C / S	F, M / A / W	SB / ME	F / N	10YR 4/3	48	38.77	98	22.074	301	1868	16	15	6.72951	1.18888	7.69988	0.912413	16.1604	17.9096	65.93	0.146334	335.664	2.74751	1.97174	34.922	0.088443	0.0565081	0	375.597	375.306	0.291286	99.9224	0.771823	0.0622108	0.398997	1359.47	10.8556	4.5808	85.7733	0.491013	0.318898	0
P-01-09-08	9	FOR	47	67	AB 2	slope deposit with aeolian sand	granite	C / S	C, S / A / W	SB / ME, CO	C / V	10YR 3/4	48	38.77	98	22.074	301	1868	16	20	9.81132	1.3	6.32954	0	7.02771	8.04229	84.93	0.182123	63.245	1.53738	0.803913	18.4985	0.220579	0.0813685	0	84.5689	84.0848	0.484071	99.4276	0.505089	0.0396477	1.0221	527.225	12.5026	3.84421	93.518	2.52058	0.945157	0
P-01-09-09	9	FOR	31	47	AB 1	slope deposit with aeolian sand	granite	C / S	C, S / A / W	SB / ME, CO	C / V	10YR 3/4	48	38.77	98	22.074	301	1868	16	20	9.81132	1.3	5.78988	0	9.41957	11.3104	79.27	0.293412	86.0974	1.4741	1.0022	23.5296	0.312706	0.115643	0	112.825	112.103	0.721761	99.3603	0.889539	0.0631089	1.31734	574.182	9.59041	3.83391	95.1621	2.85866	1.07463	0
P-01-09-10	9	FOR	8	31	Ah/AB	colluvium	granite	C / W	F-M / A / W	SB / ME	C / V	10YR 3/3	48	38.77	98	22.074	301	1868	16	12.791	6.19674	1.28382	5.01497	0.227292	9.94057	11.2894	78.77	0.863587	74.889	1.57601	0.831599	23.5178	0.502047	0.219418	0	102.399	100.814	1.58505	98.4521	0.927112	0.057384	6.00019	772.889	15.8675	4.92314	147.192	7.10249	3.15537	0
P-01-09-11	9	FOR	0	8	Ah	colluvium	granite	C / W	F / A / W	GR / ME, CO	C / F	10YR 2/2	48	38.77	98	22.074	301	1868	16	1.66963	0.66155	1.05	5.58497	0	17.771	24.189	58.04	0.715984	248.394	2.55679	0.75927	69.9347	1.87361	0.675768	0	324.91	321.645	3.26536	98.995	7.34146	0.47188	1.59564	822.27	8.25696	1.44178	140.396	8.50194	3.11709	0
P-01-10-01	10	FOR	85	100	4 R/CK	slope deposit solifluction	granite	- / -	F-C / A / W, S	SG / FI	V / N	10YR 4/2	48	38.748	98	22.169	303	1900	26.5	50	28.3019	1.5	7.74497	3.16095	6.71948	6.91052	86.37	0.090976	315.672	1.00018	1.71004	12.1033	0.094887	0.119531	0	330.791	330.486	0.305394	99.9077	0.480841	0.0426331	0.27615	1423.29	4.39937	4.42276	33.0941	0.586452	0.750959	0
P-01-10-02	10	FOR	55	85	3 BK	slope deposit 2 with aeolian sand	granite	C / S	F-M / A / W, S	SG, SB / FI	F / V	10YR 4/2	48	38.748	98	22.169	303	1900	26.5	12	5.88679	1.3	6.39428	0.849169	7.51383	5.78617	86.7	0.151431	62.2872	1.48775	0.833191	7.37713	0.0489427	0.0797464	0	72.2654	71.9852	0.28012	99.6124	0.335009	0.0373072	1.40226	856.746	19.9635	6.57396	61.5362	0.922802	1.52842	0
P-01-10-03	10	FOR	37	55	2 Ahb	slope deposit with aeolian sand	granite	A / W	F / A / W	SB,MA / FI	C / V	10YR 2/2	48	38.748	98	22.169	303	1900	26.5	16.3388	6.8116	1.10478	5.12497	0.328383	10.8756	10.8644	78.26	0.443581	91.4863	1.33004	1.28158	10.1542	0.341247	0.131358	0	105.168	104.252	0.916186	99.1288	1.21686	0.073796	1.99118	610.007	8.6516	4.90177	41.0596	3.11899	1.22044	0
P-01-10-04	10	FOR	18	37	2 Ahb	slope deposit with aeolian sand	granite	A / W	F / A / W	SB,MA / FI	C / V	10YR 2/2	48	38.748	98	22.169	303	1900	26.5	13.0596	5.46314	1.10856	4.81988	0	13.2731	13.1569	73.57	0.198704	99.5947	1.27508	0.748848	13.0593	0.412584	0.150138	0	115.439	114.678	0.761426	99.3404	1.5649	0.0947936	0.981763	730.931	9.12913	3.15256	58.1231	4.15069	1.53536	0
P-01-10-05	10	FOR	5	18	Ah 1/Ah 2	colluvium	granite	A / S	F / A / W	SB,MA / FI, ME	C / V	10YR 3/2	48	38.748	98	22.169	303	1900	26.5	9.41128	3.61329	1.01742	4.62497	0	17.0985	19.0515	63.85	0.782393	105.881	1.60968	0.812959	23.3264	0.454809	0.278194	0	133.146	131.63	1.5154	98.8619	1.97566	0.129436	2.52935	508.444	7.54077	2.23935	67.9299	2.99378	1.86144	0
P-01-10-06	10	FOR	0	5	Ah 1	colluvium	granite	A / S	F / A / W	SB, GR / ME	C / F	10YR 2/2	48	38.748	98	22.169	303	1900	26.5	2.85746	1.1322	1.05	4.68497	0	20.5013	26.6087	52.89	3.49446	168.552	2.83205	0.883001	43.0666	4.57272	0.599707	0.0332761	224.034	215.334	8.70016	96.1166	5.58407	0.391478	4.80855	344.516	5.64712	1.0353	53.3833	12.812	1.70802	0.00171065
P-02-01-01	11	FOR	30	60	2 Cw	slope deposit solifluction	granite/gneiss	- / -	F-S / F, A / W	SG	V / N	5Y 4/2	48	37.766	98	21.215	335	1938	23.5	60	36.2264	1.6	7.59497	1.74624	5.09134	22.7987	72.11	0.19726	350.805	1.43667	2.03857	7.29506	0.0763455	0.280849	0	362.13	361.575	0.554455	99.8469	0.929506	0.0464829	1.0219	2699.44	10.7849	8.99834	34.0429	0.8053	3.01133	0
P-02-01-02	11	FOR	12	30	Bw	slope deposit with aeolian sand	granite/gneiss	A / S	F-C / A / W	SB, SG / ME	F / N	10YR 4/6	48	37.766	98	21.215	335	1938	23.5	20	9.81132	1.3	5.94428	0.0889344	7.94776	8.61224	83.44	0.382337	62.3923	2.12988	0.664373	6.08391	0.208214	0.17365	0	72.0347	71.2705	0.764201	98.9391	0.343797	0.0308007	1.93116	468.105	15.5891	2.85926	27.6811	2.14136	1.81537	0
P-02-01-03	11	FOR	3	12	EBh	slope deposit with aeolian sand	granite/gneiss	C / W	F, M / A / W	SB, SG / ME	F / N	10YR 4/3	48	37.766	98	21.215	335	1938	23.5	15	7.35849	1.3	5.18954	0	19.8079	28.6321	51.56	0.504727	133.261	2.89608	1.19117	24.6067	0.961759	0.273442	0	163.695	161.955	1.73993	98.9371	1.97284	0.105845	1.35434	531.146	11.2609	2.72341	59.4776	5.25465	1.51864	0
P-02-01-04	11	FOR	0	3	Ah	slope deposit with aeolian sand	granite/gneiss	A / S	- / - / -	GR / FI	C / V	10YR 3/2	48	37.766	98	21.215	335	1938	23.5	5.83151	2.3106	1.05	4.92428	0	19.1606	32.4194	48.42	0.642556	136.954	2.63823	1.05831	25.1926	2.25444	0.301297	0	169.041	165.843	3.19829	98.108	2.35625	0.125846	0.514272	162.816	3.05975	0.721716	18.1629	3.6739	0.499109	0
P-02-02-01	12	FOR	60	80	3 Cw 2	slope deposit solifluction	granite/gneiss	- / -	F-S / F, A / W, S	SG	V / N	5Y 4/2	48	37.775	98	21.277	317	1943	28.5	85	51.3208	1.6	6.02896	0.0601191	4.21756	20.7924	74.99	0.506329	113.909	1.25858	1.96725	5.63815	0.0795082	0.297932	0	123.657	122.773	0.883769	99.2853	0.470874	0.028216	0.655752	219.132	2.362	2.17089	6.57769	0.209665	0.798624	0
P-02-02-02	12	FOR	30	60	2 Cw 1	slope deposit 2 with aeolian sand	granite/gneiss	C / S	F-C / F, A / W, S	SB, SG / VF	V / N	2.5Y 4/4	48	37.775	98	21.277	317	1943	28.5	30	16.9811	1.5	5.55474	0.0527085	3.42939	28.4806	68.09	0.473793	90.9647	1.48205	1.43439	6.58659	0.105878	0.188423	0	101.236	100.468	0.768094	99.2413	0.240429	0.0216011	4.02685	1148.39	18.2529	10.3875	50.4274	1.83227	3.31458	0
P-02-02-03	12	FOR	15	30	EB	slope deposit with aeolian sand	granite/gneiss	A / S	F, M / A / W	SB, SG / FI	F / N	10YR 4/4	48	37.775	98	21.277	317	1943	28.5	8	4.5283	1.5	5.60474	0.0817868	10.0864	23.5836	66.33	0.561635	80.0602	2.46405	1.31543	6.65	0.101561	0.213002	0	91.3659	90.4897	0.876198	99.041	0.406033	0.0307606	3.13683	664.191	19.9424	6.25997	33.457	1.15497	2.46228	0
P-02-02-04	12	FOR	3	15	EBh	slope deposit with aeolian sand	granite/gneiss	C / W	F, M / A / W	SB, MA / ME	C / N	10YR 4/3	48	37.775	98	21.277	317	1943	28.5	5	2.45283	1.3	5.01954	0	13.1955	27.2245	59.58	1.02196	73.8801	2.79254	1.14208	18.724	0.499383	0.288701	0	98.3488	96.5387	1.81005	98.1596	0.920045	0.0538382	4.08648	438.815	16.181	3.89116	67.4439	4.06588	2.38936	0
P-02-02-05	12	FOR	0	3	Ah	slope deposit with aeolian sand	granite/gneiss	C / W	F, M / A / W	SB, MA / FI, ME	C / N	10YR 3/2	48	37.775	98	21.277	317	1943	28.5	1.96789	0.779729	1.05	3.78954	0	4.94954	54.1505	40.9	22.4679	140.946	5.24384	1.08757	37.0254	5.17074	7.31422	3.82624	223.082	184.303	38.7791	82.6167	8.31998	0.303415	18.7201	174.437	6.3312	0.7721	27.7891	8.77211	12.6134	0.1191
P-02-03-01	13	FOR	30	60	2 Cw	slope deposit solifluction	granite/gneiss	- / -	F-S / F, A / F, W	SG	N / N	5Y 4/2	48	37.258	98	21.517	335	1974	27.5	90	54.3396	1.6	5.70428	0.0888971	5.17182	28.7882	66.04	0.280268	86.4979	1.75748	0.838897	5.79045	0.0728803	0.160486	0	95.3984	94.8847	0.513635	99.4616	0.289751	0.0264078	0.362978	166.4	3.2983	0.925732	6.75538	0.192187	0.430194	0
P-02-03-02	13	FOR	20	30	2 BC	slope deposit 2 with aeolian sand	granite/gneiss	A / W	F-S / A / W, S	SB, SG / VF	V / N	2.5Y 4/4	48	37.258	98	21.517	335	1974	27.5	20	11.3208	1.5	5.35428	0.123796	9.94196	18.508	71.55	0.34796	58.257	2.01783	0.285582	7.83517	0.115129	0.119368	0	68.978	68.3956	0.582457	99.1556	0.291134	0.0213493	1.12662	280.179	9.46724	0.787857	22.8521	0.758996	0.799935	0
P-02-03-03	13	FOR	4	20	EBh	slope deposit with aeolian sand	granite/gneiss	C / W	F, M / A / W	PL, SB / ME, VF	C / V	10YR 4/4	48	37.258	98	21.517	335	1974	27.5	5	2.64151	1.4	4.76954	0	18.3583	32.8317	48.81	0.960147	99.6861	2.30898	0.560009	16.2672	0.185585	0.176753	0	120.145	118.822	1.32249	98.8993	1.25977	0.0633622	5.51284	850.182	19.211	2.73969	84.1356	2.16964	2.1005	0
P-02-03-04	13	FOR	0	4	AE	slope deposit with aeolian sand	granite/gneiss	C / W	F / A / W	GR / VF	C / V	10YR 4/3	48	37.258	98	21.517	335	1974	27.5	2	0.792453	1.05	4.40954	0	22.3914	40.8386	36.77	5.03944	237.556	2.68105	1.08992	29.1998	0.225112	2.45101	0.487634	278.73	270.526	8.20319	97.0569	8.40049	0.330104	5.59659	391.874	4.31458	1.03135	29.2113	0.509033	5.63383	0.0202316
P-02-04-01	14	FOR	55	80	2 Cw 2	slope deposit solifluction	granite/gneiss	- / -	F-B / F, A / F, W	SG	N / N	10YR 5/4	48	37.322	98	21.624	326	1969	27	75	45.283	1.6	6.17497	0	7.925	12.695	79.38	0.215208	59.8947	1.97918	0.248369	5.34151	0.0551277	0.0880194	0	67.8221	67.4638	0.358355	99.4716	0.237305	0.0179675	0.580663	240.046	7.73824	0.570996	12.9825	0.30286	0.491544	0
P-02-04-02	14	FOR	25	55	2 Cw 1	slope deposit solifluction	granite/gneiss	G / W	F-S / F, A / F, W	SG	F / N	10YR 5/4	48	37.322	98	21.624	326	1969	27	35	21.1321	1.6	6.13988	0	7.67305	11.607	80.72	0.202547	52.1468	1.71295	0.260815	4.57494	0.0601654	0.0905246	0	59.0487	58.6955	0.353237	99.4018	0.331133	0.0208025	1.70509	652.061	20.8958	1.87078	34.6925	1.03128	1.57727	0
P-02-04-03	14	FOR	16	25	Bsh	slope deposit with aeolian sand	granite/gneiss	C / S	F, M / A / W	SB, PL / ME, VF	C / N	10YR 3/4	48	37.322	98	21.624	326	1969	27	5.53252	1.59094	0.76204	6.42428	0	21.4205	37.9695	40.61	0.298646	359.626	3.34637	0.918867	22.7642	2.4753	0.227236	0	389.657	386.656	3.00118	99.2298	4.9745	0.165305	0.522066	933.813	8.47685	1.36864	35.8468	8.81054	0.822173	0
P-02-04-04	14	FOR	2	16	E	slope deposit with aeolian sand	granite/gneiss	C / W	F / A / W	GR, SB / ME	C / V	10YR 4/4	48	37.322	98	21.624	326	1969	27	5.40462	2.39321	1.17344	6.20896	0	13.5521	16.3679	70.08	0.240099	121.603	2.38988	0.370009	8.72989	0.521157	0.143791	0	133.998	133.093	0.905047	99.3246	1.92308	0.0708341	1.00674	757.374	14.5209	1.32192	32.9734	4.44939	1.24788	0
P-02-04-05	14	FOR	0	2	AE	slope deposit with aeolian sand	granite/gneiss	C / S	F / A / W	GR, SG / VF	C / V	2.5Y 4/3	48	37.322	98	21.624	326	1969	27	2.47103	0.979086	1.05	6.48428	0	2.87705	7.14295	89.98	0.295912	288.722	3.18324	0.467932	19.7945	0.5282	0.28797	0	313.279	312.167	1.11208	99.645	4.35908	0.159222	0.163524	236.995	2.54906	0.220328	9.85354	0.594325	0.32937	0
P-02-05-01	15	FOR	70	94	3 C	slope deposit solifluction	granite/gneiss	- / -	F-S / F, A / W, S	MA	V / N	2.5YR 3/3	48	37.728	98	21.233	324	1947	25	40	19.6226	1.3	7.74474	3.14024	6.10628	24.3337	69.56	0.0557043	417.719	0.884502	1.34356	7.65336	0.0898302	0.333863	0	428.08	427.6	0.479397	99.888	0.664351	0.0311059	0.281359	3133.98	6.47385	5.78226	34.822	0.92385	3.49026	0
P-02-05-02	15	FOR	47	70	3 C	slope deposit solifluction	granite/gneiss	- / -	F-S / F, A / W, S	MA	V / N	2.5YR 3/3	48	37.728	98	21.233	324	1947	25	40	19.6226	1.3	7.43988	0.0528872	4.72275	19.5773	75.7	0.260393	185.886	0.848012	1.33096	5.10352	0.0656373	0.39391	0	193.889	193.169	0.71994	99.6287	0.892422	0.044623	1.26043	1336.52	5.94815	5.48937	22.253	0.646913	3.94642	0
P-02-05-03	15	FOR	32	47	2 BC	slope deposit with aeolian sand	granite/gneiss	C / S	F, C / F, A / W, S	SG, SB / VF	F / V	10YR 3/4	48	37.728	98	21.233	324	1947	25	15	7.35849	1.3	5.63474	0	7.66469	16.2053	76.13	0.268169	66.6019	1.48654	1.78142	5.94922	0.064863	0.0866238	0	76.2387	75.8191	0.419656	99.4496	0.245261	0.0150291	1.1993	442.432	9.63359	6.78819	23.9668	0.590641	0.801817	0
P-02-05-04	15	FOR	7	32	Bw/Bh/Bs	slope deposit with aeolian silt	granite/gneiss	C / W	F, M / F, A / W	SG, SB / FI	C / F	10YR 4/4	48	37.728	98	21.233	324	1947	25	29.0074	10.5326	0.96222	4.40988	0	11.4731	18.5969	69.93	1.64711	48.8308	2.11732	0.939539	11.9058	0.11606	0.343408	0	65.9	63.7934	2.10658	96.8034	0.499156	0.0263127	7.58955	334.216	14.1375	3.68874	49.4178	1.08889	3.27509	0
P-02-05-05	15	FOR	0	7	AE	slope deposit with aeolian silt	granite/gneiss	A / W	F / A / W	SB, GR / ME, FI	C / F	10YR 4/3	48	37.728	98	21.233	324	1947	25	8.87311	3.01351	0.9	4.18988	0	10.5199	26.9601	62.52	3.61535	46.5037	3.04342	0.477905	12.912	0.211313	1.10141	0.631756	68.4968	62.937	5.55983	91.8831	0.946824	0.0457571	5.6002	106.999	6.83136	0.63076	18.0168	0.666477	3.53118	0.0365592
P-02-06-01	16	FOR	60	66	3 C	slope deposit solifluction	granite/gneiss	- / -	F-S / F, A / W	SG	N / N	2.5YR 3/2	48	37.787	98	21.21	357	1913	23.5	60	33.9623	1.5	6.27474	0	6.17787	24.6421	69.18	0	92.4582	1.60709	0.864377	5.21699	0.0783099	0.276254	0	100.501	100.147	0.354564	99.6472	0.532211	0.0281159	0	133.399	2.26204	0.715387	4.56476	0.154879	0.555387	0
P-02-06-02	16	FOR	42	60	2 BC/ 3 C	slope deposit solifluction	granite/gneiss	C / S	F, C / A / W	MA	V / N	10YR 4/6	48	37.787	98	21.21	357	1913	23.5	20	9.81132	1.3	5.90497	0	7.71924	12.9208	79.36	0	54.2585	1.93063	0.682832	5.01544	0.125622	0.101354	0	62.1144	61.8874	0.226976	99.6346	0.324034	0.0199401	0	407.08	14.1307	2.9387	22.8197	1.29195	1.05957	0
P-02-06-03	16	FOR	20	42	2 Bw	slope deposit with aeolian sand	granite/gneiss	G / S	F-S / F, A / W	SB / VF, FI	F / N	10YR 4/4	48	37.787	98	21.21	357	1913	23.5	25	12.2642	1.3	5.21497	0	12.7962	9.91377	77.29	0.110787	53.6049	2.20037	0.683888	8.63577	0.0921208	0.145436	0	65.4733	65.1249	0.348344	99.468	0.459942	0.0231796	0.641185	460.827	18.4536	3.37246	45.0219	1.08557	1.74215	0
P-02-06-04	16	FOR	12	20	Bsh	slope deposit with aeolian sand	granite/gneiss	A / W	F / A / W	SB, MA / FI, ME	F / N	10YR 4/3	48	37.787	98	21.21	357	1913	23.5	7.28308	3.57283	1.3	5.01	0	12.9883	23.5617	63.45	0.148601	59.9974	2.57242	0.628979	9.90228	0.146936	0.129392	0	73.526	73.1011	0.424929	99.4221	0.50968	0.0353797	0.386616	231.863	9.69822	1.39432	23.2072	0.778383	0.696761	0
P-02-06-05	16	FOR	2	12	BEhs	slope deposit with aeolian silt	granite/gneiss	C / W	F / A / W	SB, GR / FI	C / V	10YR 2/3	48	37.787	98	21.21	357	1913	23.5	10.1432	4.55387	1.18974	4.93	0	15.5911	27.3089	57.1	0.391653	87.1748	2.82299	0.774308	15.8582	0.69421	0.110621	0	107.827	106.63	1.19648	98.8904	1.04684	0.0571065	1.12972	373.508	11.7997	1.90306	41.2053	4.07724	0.660424	0
P-02-06-06	16	FOR	0	2	Ah	slope deposit with aeolian silt	granite/gneiss	C / W	- / - / -	GR / FI	C / V	10YR 2/1	48	37.787	98	21.21	357	1913	23.5	1.74305	0.591981	0.9	4.78988	0.0188917	19.8487	39.3813	40.77	1.2256	459.805	3.77354	2.23536	57.8647	7.53522	0.400028	0	532.84	523.679	9.16085	98.2807	20.1407	0.747099	0.58486	325.924	2.60941	0.908907	24.874	7.32157	0.395103	0
P-02-07-01	17	FOR	50	80	3 C	slope deposit solifluction	granite/gneiss	- / -	F-S / F, A / W	SB, MA / VF, FI	V / N	2.5YR 5/4	48	37.816	98	21.208	359	1908	22	40	22.6415	1.5	5.23428	0	4.23631	17.9937	77.77	0.231655	92.1774	1.36757	0.998336	6.67926	0.0771826	0.0879702	0	101.619	101.223	0.396807	99.6095	0.284166	0.0187487	1.68761	997.457	14.4368	6.19692	43.8316	1.14487	1.32643	0
P-02-07-02	17	FOR	34	50	2 Bw	slope deposit solifluction	granite/gneiss	C / S	S, C / A / W	SB, MA / FI	F / N	10YR 5/6	48	37.816	98	21.208	359	1908	22	15	7.35849	1.3	5.17988	0	7.28501	11.155	81.56	0.378353	40.4698	1.83521	0.610426	5.79789	0.147356	0.0732943	0	49.3123	48.7133	0.599003	98.7853	0.181129	0.0164188	1.80487	286.761	12.686	2.48114	24.9143	1.43127	0.723664	0
P-02-07-03	17	FOR	22	34	2 BC	slope deposit with aeolian sand	granite/gneiss	C / W	F, C / A / W	SB, MA / VF, FI	F / V	10YR 5/4	48	37.816	98	21.208	359	1908	22	15	8.49057	1.5	4.74988	0	7.13671	21.1133	71.75	0.74393	59.2699	1.9017	1.32408	8.08483	0.121672	0.195771	0	71.6419	70.5805	1.06137	98.5185	0.378343	0.0198641	3.07107	363.439	11.376	4.65737	30.0648	1.02272	1.67272	0
P-02-07-04	17	FOR	15	22	2 Bs	slope deposit with aeolian sand	granite/gneiss	A / S	F-S / F, A / W	SB, MA / VF, FI	F / V	10YR 4/3	48	37.816	98	21.208	359	1908	22	20	9.81132	1.3	4.75988	0	8.3975	13.2825	78.32	0.684133	48.3164	1.59649	0.899166	7.62906	0.190219	0.352879	0	59.6684	58.4412	1.22723	97.9432	0.377935	0.0198585	1.34381	140.972	4.54417	1.5049	13.4989	0.760778	1.43464	0
P-02-07-05	17	FOR	6	15	Bhs	slope deposit with aeolian silt	granite/gneiss	A / S	F, M / A / W	SB, GR / ME, FI	C / F	10YR 3/4	48	37.816	98	21.208	359	1908	22	12.0715	5.38853	1.18292	4.56474	0	11.8184	27.1816	61	1.3774	70.8413	2.05027	1.54841	10.8608	0.12384	0.655092	0.0162761	87.4734	85.3008	2.1726	97.5163	0.894592	0.0373558	3.47899	265.779	7.50407	3.33235	24.7107	0.636884	3.42463	0.00153581
P-02-07-06	17	FOR	0	6	ABh	slope deposit with aeolian silt	granite/gneiss	C / W	F, M / A / W	GR, SB / FI, ME	C / F	10YR 2/3	48	37.816	98	21.208	359	1908	22	3.68541	1.46026	1.05	4.05497	0.495166	11.9762	37.1538	50.87	4.95054	93.4039	1.9633	0.992376	15.5229	0.535977	2.02631	1.22949	120.625	111.882	8.74232	92.7525	1.99654	0.0976421	8.10496	227.145	4.65776	1.38434	22.8929	1.7867	6.86631	0.0752003
P-02-08-01	18	FOR	80	100	3 C	slope deposit solifluction	granite/gneiss	- / -	F-S / F, A / W	SG	V / N	2.5Y 3/1	48	37.755	98	21.28	351	1951	34.5	75	42.4528	1.5	6.61713	0	2.44645	25.8835	71.67	0.619152	91.834	1.12735	0.708619	3.01762	0.068746	0.927818	0	98.3033	96.6876	1.61572	98.3564	0.458673	0.0338906	1.25292	276.039	3.30581	1.22183	5.50074	0.283258	3.88605	0
P-02-08-02	18	FOR	52	80	3 C	slope deposit solifluction	granite/gneiss	- / -	F-S / F, A / W	SG	V / N	2.5Y 3/1	48	37.755	98	21.28	351	1951	34.5	75	42.4528	1.5	5.78	0	3.44823	27.4518	69.1	0.228543	86.898	1.40307	0.900125	4.43183	0.0279301	0.193525	0	94.083	93.633	0.449998	99.5217	0.2829	0.0225641	0.647476	365.683	5.76007	2.17284	11.3101	0.161115	1.13477	0
P-02-08-03	18	FOR	36	52	2 BC	slope deposit solifluction	granite/gneiss	C / W	F-S / F, A / W	SG	F / N	2.5Y 3/2	48	37.755	98	21.28	351	1951	34.5	30	14.717	1.3	5.17474	0	4.45642	23.2336	72.31	0.5902	79.6525	1.27931	1.52247	10.1182	0.0257	0.190893	0	93.3793	92.5725	0.806793	99.136	0.348705	0.02652	2.31861	464.801	7.28277	5.09617	35.8065	0.205573	1.55215	0
P-02-08-04	18	FOR	20	36	2 Bw	slope deposit with aeolian sand	granite/gneiss	C / W	F-C / A / W	SB, MA / FI, ME	F / N	10YR 4/4	48	37.755	98	21.28	351	1951	34.5	12	5.88679	1.3	4.54988	0	6.44947	17.1205	76.43	2.01664	58.3901	1.62325	1.12073	12.3904	0.0499942	0.389096	0	75.9802	73.5245	2.45572	96.7679	0.442132	0.030742	9.95954	428.343	11.6169	4.71607	55.1221	0.502734	3.97728	0
P-02-08-05	18	FOR	5	20	BEhs	slope deposit with aeolian silt	granite/gneiss	C / S	F / A / W	SB / ME	C / V	10YR 4/2	48	37.755	98	21.28	351	1951	34.5	8.31688	3.29298	1.04924	3.91896	0	10.6916	35.1684	54.14	10.4558	58.563	2.29921	0.44417	16.7534	0.181288	2.07774	1.07348	91.8481	78.0597	13.7883	84.9879	1.4744	0.0729642	40.7081	338.676	12.9716	1.47347	58.7562	1.43714	16.7429	0.156138
P-02-08-06	18	FOR	0	5	AE	slope deposit with aeolian silt	granite/gneiss	C / W	F / A / W	GR, MA / VF, FI	C / V	10YR 3/3	48	37.755	98	21.28	351	1951	34.5	4.39744	1.49347	0.9	3.45428	0	14.3273	41.8527	43.82	31.6886	81.9983	3.20885	0.442704	25.3664	0.142233	6.01239	5.3692	154.229	111.016	43.2124	71.9816	4.55081	0.199201	36.7833	141.382	5.39746	0.437855	26.5239	0.336167	14.4449	0.232837
P-02-09-01	19	FOR	50	80	3 C	slope deposit solifluction	granite/gneiss	- / -	F-C / F, A / W	SG	V / N	2.5Y 5/3	48	37.799	98	21.268	358	1930	30	50	28.3019	1.5	5.76474	0	2.71936	29.2706	68.01	0.679281	82.7651	0.637842	0.958323	3.32087	0.0407501	0.457434	0	88.8596	87.6821	1.17746	98.6749	0.525247	0.0329178	4.1238	746.338	5.61117	4.95712	18.1606	0.503714	5.74772	0
P-02-09-02	19	FOR	23	50	3 BC	slope deposit solifluction	granite/gneiss	C / S	F-C / F, A / W	SG	F / V	2.5Y 4/3	48	37.799	98	21.268	358	1930	30	30	14.717	1.3	4.51	0	3.48218	27.5578	68.96	1.36714	95.0674	2.07979	3.03634	10.3538	0.0335748	0.306046	0.0162769	112.26	110.537	1.72304	98.4651	0.486982	0.0309046	9.06326	936.144	19.9794	17.1511	61.83	0.453201	4.19929	0.00403124
P-02-09-03	19	FOR	9	23	2 Bw	slope deposit with aeolian sand	granite/gneiss	C / S	F-C / F, A / W	SA, MA / VF	C / V	10YR 4/4	48	37.799	98	21.268	358	1930	30	30	14.717	1.3	4.73474	0	7.25835	19.8817	72.86	1.13235	61.73	1.96226	1.06433	11.5911	0.138614	0.399176	0	78.0178	76.3476	1.67014	97.8593	0.55012	0.0313638	3.89239	315.189	9.77427	3.11731	35.8913	0.970171	2.84	0
P-02-09-04	19	FOR	0	9	BEhs	slope deposit with aeolian silt	granite/gneiss	C / W	F, C / F / W	SA, MA / FI	C / F	10YR 3/3	48	37.799	98	21.268	358	1930	30	22.0146	4.95104	0.59598	3.88988	0	16.0874	39.9426	43.97	22.7638	114.307	3.75768	0.567128	22.5909	1.16391	6.19742	2.1736	173.522	141.223	32.2987	81.3864	4.46501	0.164327	25.692	191.632	6.14562	0.545386	22.9676	2.67472	14.4771	0.0916489
P-02-10-01	20	FOR	55	65	3 C	slope deposit solifluction	granite/gneiss	C / S	F-S / A / W	SG	N / N	2.5Y 3/1	48	37.825	98	21.271	1	1914	24	70	39.6226	1.5	5.78816	0	2.17079	21.1392	76.69	0.531462	125.318	0.874074	0.60655	9.92526	0.0488228	0.395915	0	137.7	136.724	0.9762	99.2911	0.80653	0.0406453	0.645284	226.012	1.53787	0.627501	10.8555	0.1207	0.994945	0
P-02-10-02	20	FOR	40	55	2 BC	slope deposit solifluction	granite/gneiss	C / S	F, M, S / A / W	MA, SG	V / N	2.5Y 4/3	48	37.825	98	21.271	1	1914	24	30	16.9811	1.5	5.17988	0	5.66167	21.6283	72.71	0.321443	76.4987	1.82567	0.591333	9.1446	0.0514592	0.123881	0	88.5571	88.0603	0.496783	99.439	0.294176	0.0266043	1.366	482.882	11.2424	2.14115	35.0059	0.445263	1.0896	0
P-02-10-03	20	FOR	17	40	2 Bw	slope deposit with aeolian sand	granite/gneiss	C / S	F-C / A / W	SA, MA / FI	F / V	10YR 4/4	48	37.825	98	21.271	1	1914	24	15	7.35849	1.3	4.80428	0	8.3745	15.3855	76.24	0.854591	47.7229	2.68007	0.480192	11.7022	0.0727999	0.192715	0	63.7055	62.5854	1.12011	98.2417	0.328302	0.0253761	5.86023	486.097	26.6314	2.80569	72.286	1.01647	2.73521	0
P-02-10-04	20	FOR	4	17	BEsh	slope deposit with aeolian silt	granite/gneiss	C / W	F, M / A / W	SA, GR / ME, FI	C / F	10YR 4/3	48	37.825	98	21.271	1	1914	24	10.9009	3.2849	0.79856	3.83896	0	14.5645	28.0255	57.41	12.9214	58.6494	3.55003	0.42575	19.2775	0.299282	2.33389	1.49814	98.9554	81.9027	17.0527	82.7673	1.6055	0.0790639	32.2478	217.417	12.8385	0.905346	43.3383	1.52082	12.0556	0.139681
P-02-10-05	20	FOR	0	4	BEhs	slope deposit with aeolian silt	granite/gneiss	C / W	F, M / A / W	SA, GR / FI, VF	C / F	10YR 3/3	48	37.825	98	21.271	1	1914	24	5.36557	1.82227	0.9	3.73474	0	15.2963	36.9637	47.74	17.3411	76.1319	4.67519	0.230725	25.3431	3.90151	4.91945	2.75517	135.298	106.381	28.9172	78.627	3.86746	0.173981	15.9402	103.95	6.22743	0.18071	20.9849	7.30225	9.35951	0.0946152
P-02-11-01	21	FOR	65	90	3 C	slope deposit solifluction	granite/gneiss	- / -	F-B / F, A / W	SG	F / N	2.5Y 3/3	48	37.7	98	21.276	315	1990	39	75	42.4528	1.5	4.62713	0.196205	2.44559	16.1444	81.41	0.519933	64.0406	1.41866	2.0566	5.69947	0.128623	0.161961	0	74.0258	73.2153	0.810517	98.9051	0.150035	0.016618	1.31518	240.62	5.20006	4.43259	12.9868	0.662466	0.847944	0
P-02-11-02	21	FOR	40	65	3 C	slope deposit solifluction	granite/gneiss	- / -	F-B / F, A / W	SG	F / N	2.5Y 3/3	48	37.7	98	21.276	315	1990	39	75	42.4528	1.5	4.19988	0	2.45613	36.9539	60.59	2.77488	66.2601	1.52613	1.29413	6.14887	0.119381	0.424127	0.333768	78.8814	75.2293	3.65216	95.3701	0.246748	0.0207575	7.01911	248.96	5.59398	2.78923	14.0108	0.614867	2.22051	0.0315411
P-02-11-03	21	FOR	25	40	2 BC	slope deposit with aeolian sand	granite/gneiss	G / S	F-S / A / W	SB, MA / FI	F / N	2.5Y 4/2	48	37.7	98	21.276	315	1990	39	40	15.8491	1.05	4.23474	0	2.97435	22.0256	75	2.90607	65.5102	2.33968	1.02954	7.90541	0.0484129	0.501465	0.382779	80.6235	76.7848	3.83872	95.2387	0.320505	0.0278267	7.40975	248.111	8.64464	2.2367	18.1573	0.251343	2.64641	0.036462
P-02-11-04	21	FOR	11	18	BEsh	slope deposit with aeolian silt	granite/gneiss	C / S	F / A / W	SB, SA / FI	F / V	10YR 3/4	48	37.7	98	21.276	315	1990	39	8.80496	3.48876	1.05	4.00497	0	12.9026	32.1674	54.93	5.25622	55.8758	3.79368	0.39174	19.7584	0.101974	0.921574	1.09726	87.1966	79.8196	7.37703	91.5398	0.768416	0.126579	9.50601	150.103	9.94207	0.603659	32.1889	0.375508	3.44963	0.0741358
P-02-11-05	21	FOR	2	11	BEhs	slope deposit with aeolian silt	granite/gneiss	C / S	F / A / W	SB, SA / ME	C / F	10YR 3/3	48	37.7	98	21.276	315	1990	39	6.45956	2.49982	1.02554	3.98	0	13.1173	34.8927	51.99	6.72964	68.3973	4.21307	0.454733	23.4238	0.486829	1.24924	1.56911	106.524	96.4889	10.0348	90.5797	1.61405	0.0900707	15.6766	236.668	14.2217	0.902581	49.1527	2.3091	6.02316	0.136555
P-02-11-06	21	FOR	0	2	AE	slope deposit with aeolian silt	granite/gneiss	A / S	F / A / W	GR / ME	C / C	10YR 2/2	48	37.7	98	21.276	315	1990	39	2.99582	1.01745	0.9	4.17	0	14.3323	45.0077	40.66	4.66268	173.766	10.7875	0.450671	57.8393	9.63421	1.46954	1.81957	260.43	242.844	17.586	93.2473	10.792	0.466086	2.19667	121.6	7.36449	0.180908	24.5461	9.2417	1.43294	0.0320253
P-02-11-09	21	FOR	18	25	2 Bw	slope deposit with aeolian silt	granite/gneiss	G / S	F-S / A / W	SB, SA / FI	F / N	10YR 4/4	48	37.7	98	21.276	315	1990	39	40	15.8491	1.05	4.40497	0	6.06422	13.5258	80.41	1.71943	38.9859	2.92402	0.485123	8.08302	0.0863058	0.345124	0.24297	52.8719	50.4781	2.39383	95.4724	0.286499	0.0233583	2.04592	68.9053	5.04169	0.491842	8.66379	0.209099	0.84996	0.0108007
P-02-12-01	22	FOR	70	90	3 C	slope deposit solifluction	granite/gneiss	C / S	C, S / A / W	SG	N / N	2.5Y 4/2	48	37.83	98	21.208	334	1900	11	70	39.6226	1.5	7.73497	2.94919	6.65674	20.8433	72.5	0.099559	386.061	1.52367	0.92654	9.52927	0.14957	0.0869125	0	398.376	398.04	0.336042	99.9156	0.273115	0.0233302	0.241763	1392.53	5.36156	1.91709	20.8448	0.739539	0.436826	0
P-02-12-02	22	FOR	55	70	3 BC	slope deposit solifluction	granite/gneiss	C / S	F, C / A / W	SG	N / N	10YR 3/4	48	37.83	98	21.208	334	1900	11	20	11.3208	1.5	6.64474	0	4.7162	8.7138	86.57	0.0601223	66.5144	1.56272	0.67971	3.39778	0.142701	0.152326	0	72.5098	72.1546	0.35515	99.5102	0.288089	0.0279781	0.291994	479.838	10.9979	2.81275	14.8649	1.41115	1.5312	0
P-02-12-03	22	FOR	32	55	2 Bw/Bhs 2	slope deposit with aeolian sand	granite/gneiss	C / S	F-B / A / W	SB / VF, FI	V / N	10YR 4/4	48	37.83	98	21.208	334	1900	11	25.6734	14.5321	1.5	5.90988	0	5.07387	6.22613	88.7	0.30033	46.7796	1.60404	0.614175	3.27331	0.143501	0.109566	0	52.8245	52.2711	0.553397	98.9524	0.198209	0.0190499	2.07792	480.757	16.0818	3.62068	20.4008	2.02158	1.569	0
P-02-12-04	22	FOR	22	32	2 Bhs	slope deposit with aeolian sand	granite/gneiss	C / S	F, M / A / W	SB / FI	F / N	10YR 4/3	48	37.83	98	21.208	334	1900	11	35.0252	17.1822	1.3	5.58474	0	10.0968	15.5932	74.31	0.163963	76.3482	2.67216	0.766438	6.2052	0.0606206	0.159737	0	86.3763	85.992	0.384321	99.5551	0.38607	0.0280169	0.37368	258.46	8.82488	1.48833	12.7391	0.281307	0.753493	0
P-02-12-05	22	FOR	4	22	Bh	slope deposit with aeolian silt	granite/gneiss	C / S	F / A / W	GR / ME	F / N	10YR 3/4	48	37.83	98	21.208	334	1900	11	2.81167	1.46699	1.38264	5.29474	0	15.6443	25.7257	58.63	0.228001	110.199	3.26587	0.864021	12.9401	0.160357	0.276963	0	127.934	127.269	0.665321	99.4799	1.08143	0.0677684	1.48798	1068.26	30.8853	4.80458	76.0725	2.13086	3.74113	0
P-02-12-06	22	FOR	0	4	Ah	slope deposit with aeolian silt	granite/gneiss	C / S	F / A / W	GR / ME	C / F	10YR 2/3	48	37.83	98	21.208	334	1900	11	4.25325	1.4445	0.9	5.27497	0	18.4445	32.5555	49	0.367993	162.845	3.19974	1.59564	20.3927	0.400987	0.402148	0	189.204	188.033	1.17113	99.381	2.25129	0.123118	0.342241	224.961	4.3122	1.26443	17.0843	0.759328	0.774099	0
P-02-13-01	23	FOR	70	100	3 C 2	slope deposit solifluction	granite/gneiss	- / -	F-B / F, A / W, S	SG	V / N	2.5Y 3/1	48	37.736	98	21.29	345	1977	37	50	28.3019	1.5	6.07428	0	1.6116	12.7884	85.6	0.574868	120.535	1.02011	1.27865	6.82122	0.0735593	0.717769	0	131.021	129.655	1.3662	98.9573	0.658374	0.0406975	3.48993	1086.93	8.97401	6.61408	37.3027	0.909271	9.01886	0
P-02-13-02	23	FOR	40	70	3 C 1	slope deposit solifluction	granite/gneiss	G / S	F-B / F, A / W, S	SG	F / N	2.5Y 3/2	48	37.736	98	21.29	345	1977	37	80	45.283	1.5	5.03988	0	1.52754	13.4725	85	0.716676	74.3885	0.794916	1.21776	6.57523	0.0360222	0.280577	0	84.0096	82.9764	1.03328	98.7701	0.335188	0.0236927	1.74033	268.321	2.79719	2.51964	14.383	0.178109	1.41019	0
P-02-13-03	23	FOR	29	40	3 BC	slope deposit solifluction	granite/gneiss	G / S	F-S / F, A / W	SG	C / N	2.5Y 4/2	48	37.736	98	21.29	345	1977	37	30	14.717	1.3	4.81	0	2.42973	23.4103	74.16	0.872228	52.7043	1.31028	1.38015	8.01645	0.0188351	0.362114	0	64.6643	63.4111	1.25318	98.062	0.412735	0.0234354	2.35576	211.439	5.1281	3.17611	19.5035	0.10358	2.02425	0
P-02-13-04	23	FOR	16	29	2 Bw	slope deposit with aeolian sand	granite/gneiss	C / W	F, C / A / W	SB, MA / FI	C / V	10YR 4/2	48	37.736	98	21.29	345	1977	37	19.802	9.71417	1.3	4.63	0	10.9275	25.7025	63.37	1.48375	68.9218	2.4842	0.998104	13.1969	0.0311342	0.549104	0	87.665	85.601	2.06399	97.6456	0.471068	0.0297902	5.42598	374.38	13.1642	3.11001	43.4729	0.231825	4.15613	0
P-02-13-05	23	FOR	4	16	BE	slope deposit with aeolian silt	granite/gneiss	C / W	F, M / A / W	Gr / FI, ME	C / F	10YR 3/3	48	37.736	98	21.29	345	1977	37	8.7707	3.5335	1.06762	4.21474	0.920687	13.6741	34.1059	52.22	5.64808	69.894	3.61868	0.620973	18.8123	0.125767	1.71728	0.54787	100.985	92.9459	8.039	92.0394	1.03322	0.0588627	17.8115	327.399	16.5364	1.66855	53.4405	0.807552	11.2088	0.0645461
P-02-13-06	23	FOR	0	4	AE	slope deposit with aeolian silt	granite/gneiss	A / W	F, M / A / W	GR, SB / FI	C / F	10YR 3/2	48	37.736	98	21.29	345	1977	37	11.1621	4.42272	1.05	4.02497	0.807133	13.3494	36.1906	50.46	8.93729	67.7891	3.60816	0.511873	21.3488	1.00279	2.26694	1.27698	106.742	93.2579	13.484	87.3677	1.76559	0.0891212	8.99745	101.371	5.2637	0.439082	19.3605	2.05557	4.72358	0.0480279
P-02-14-01	24	FOR	65	90	3 C	slope deposit solifluction	granite/gneiss	- / -	F-S / F, A / W	SG	V / N	2.5Y 4/2	48	37.843	98	21.256	352	1908	12	50	28.3019	1.5	7.77497	2.41391	2.86066	21.6493	75.49	0.0423478	264.851	0.813013	0.601898	5.16011	0.193775	0.112474	0	271.774	271.426	0.348597	99.8717	0.00640979	0.0158042	0.214239	1990.25	5.96014	2.59453	23.5156	1.99605	1.17771	0
P-02-14-02	24	FOR	38	65	3 C	slope deposit solifluction	granite/gneiss	- / -	F-S / F, A / W	SG	V / N	2.5Y 4/2	48	37.843	98	21.256	352	1908	12	50	28.3019	1.5	7.58474	2.80211	5.789	22.961	71.25	0.0856376	404.88	0.780274	0.798261	7.87698	0.0454987	0.339853	0	414.807	414.336	0.470989	99.8865	0.486847	0.0343183	0.467903	3285.93	6.17774	3.71625	38.7686	0.506171	3.84327	0
P-02-14-03	24	FOR	11	38	2 Bw/Bh	slope deposit with aeolian sand	granite/gneiss	SC / W	F, C / A / W	SB, MA / ME, FI	F / N	10YR 4/2	48	37.843	98	21.256	352	1908	12	26.2851	12.8946	1.3	5.72497	0	9.70098	11.279	79.02	0.234925	62.0677	2.29269	0.589802	5.99838	0.105671	0.116407	0	71.4056	70.9486	0.457003	99.36	0.340832	0.0274922	1.64005	643.626	23.1935	3.50836	37.7218	1.50207	1.682	0
P-02-14-04	24	FOR	3	11	Bh	slope deposit with aeolian silt	granite/gneiss	A / S	F / A / W	Gr, SB / ME, FI	C / V	10YR 3/3	48	37.843	98	21.256	352	1908	12	7.26671	3.3202	1.2108	5.37	0	19.3567	27.6033	53.04	0.0686118	120.156	3.13867	0.686324	12.6881	0.202476	0.297781	0	137.238	136.669	0.568869	99.5855	1.25664	0.0738117	0.166289	432.562	11.023	1.4173	27.7006	0.999181	1.49376	0
P-02-14-05	24	FOR	0	3	Ah	slope deposit with aeolian silt	granite/gneiss	C / W	F / A / W	Gr / ME	C / F	10YR 2/2	48	37.843	98	21.256	352	1908	12	0.966025	0.328084	0.9	5.35954	0	25.8492	33.3808	40.77	0.958786	428.89	3.73285	1.3665	43.8351	5.13407	0.434756	0	484.352	477.825	6.52761	98.6523	11.3371	0.498683	0.691728	459.621	3.90253	0.840024	28.4883	7.54193	0.649198	0
P-02-15-01	25	FOR	43	70	2 C	slope deposit solifluction	granite/gneiss	- / -	F-S / F, A / W	SG	V / N	2.5Y 4/2	48	37.649	98	21.231	336	1994	28.5	55	31.1321	1.5	4.52988	0	2.61185	27.6582	69.73	0.913516	75.3315	2.73884	2.1123	11.9435	0.127681	0.181969	0	93.3493	92.1261	1.22317	98.6897	0.257958	0.0188809	4.4921	550.238	19.516	8.85033	52.9047	1.2784	1.85203	0
P-02-15-02	25	FOR	29	43	2 BC	slope deposit solifluction	granite/gneiss	C / W	F-S / F, A / W	MA, SG	F / N	2.5Y 4/3	48	37.649	98	21.231	336	1994	28.5	40	22.6415	1.5	4.25474	0	2.15682	30.3232	67.52	2.51231	71.3361	1.83659	2.06484	11.888	0.0701671	0.469425	0.265751	90.4432	87.1255	3.31765	96.3318	0.434353	0.0299905	8.54102	360.235	9.04775	5.98124	36.4061	0.48571	3.30309	0.0337525
P-02-15-03	25	FOR	15	29	Bw 2	slope deposit with aeolian sand	granite/gneiss	C / S	F-S / F, A / W	SB / FI, ME	F / V	10YR 4/4	48	37.649	98	21.231	336	1994	28.5	22.0109	10.7978	1.3	4.34474	0	11.1751	25.1849	63.64	2.65635	59.6364	2.48429	1.24207	13.8838	0.136092	0.463762	0	80.5027	77.2465	3.25621	95.9552	0.3843	0.0298083	10.1732	339.252	13.7869	4.05309	47.8971	1.06124	3.67608	0
P-02-15-04	25	FOR	10	15	Bw 1	slope deposit with aeolian sand	granite/gneiss	C / S	F, C / F, A / W	SB / FI, ME	F / V	10YR 4/3	48	37.649	98	21.231	336	1994	28.5	20.6862	8.19642	1.05	3.98	0	12.3227	25.4073	62.27	6.47028	51.874	3.13133	1.52384	15.9826	0.121242	1.25985	0.979494	81.3426	72.5118	8.83087	89.1436	0.614881	0.0410716	7.26938	86.5692	5.09793	1.45875	16.1753	0.277353	2.92962	0.0411122
P-02-15-05	25	FOR	2	10	BEhs	slope deposit with aeolian silt	granite/gneiss	C / W	F / A / W	SB / FI, ME	F / F	10YR 3/4	48	37.649	98	21.231	336	1994	28.5	4.96967	2.04477	1.09034	3.85474	0	17.1652	37.5248	45.31	12.0194	55.8054	3.79111	0.670904	20.6648	0.189305	2.31673	1.90349	97.3612	80.9322	16.429	83.1258	1.44744	0.0839045	26.8822	185.394	12.2868	1.27853	41.6333	0.862084	10.7244	0.159047
P-02-15-06	25	FOR	0	2	AE	slope deposit with aeolian silt	granite/gneiss	A / W	F / A / W	GR / FI	C / F	10YR 3/3	48	37.649	98	21.231	336	1994	28.5	0.429609	0.145905	0.9	3.81497	0.272859	18.5149	42.0151	39.47	6.80415	127.504	5.74095	0.530384	42.8161	0.419823	2.84616	3.56207	190.224	176.592	13.6322	92.8336	8.83325	0.345426	3.29036	91.5868	4.02295	0.218538	18.6511	0.413373	2.8487	0.0643526
P-02-16-01	26	FOR	62	70	3 C	slope deposit solifluction	granite/gneiss	- / -	F-S / - / -	MA, SG	N / N	2.5Y 4/2	48	37.669	98	21.199	346	1982	29	70	39.6226	1.5	4.88497	0	5.9142	45.1358	48.95	0.199494	74.3981	2.34266	1.56674	13.4256	0.169449	0.070635	0	92.1727	91.7331	0.439578	99.5231	0.181018	0.0224419	0.193776	107.342	3.29739	1.29669	11.7471	0.335131	0.142006	0
P-02-16-02	26	FOR	46	62	3 BC	slope deposit solifluction	granite/gneiss	C / W	F-S / - / -	MA	V / N	10YR 5/4	48	37.669	98	21.199	346	1982	29	65	36.7925	1.5	4.87	0	8.15714	17.6729	74.17	0.461418	39.7852	2.36274	0.871689	11.8367	0.119422	0.0950344	0	55.5321	54.8563	0.675875	98.7829	0.187079	0.0196666	1.04578	133.939	7.75985	1.68336	24.166	0.55111	0.445804	0
P-02-16-03	26	FOR	28	46	2 Bs/Bw	slope deposit with aeolian sand	granite/gneiss	G / W	F-S / F, A / W, S	SB, SG / FI, ME	F / V	10YR 4/6	48	37.669	98	21.199	346	1982	29	50	24.5283	1.3	4.83474	0	8.1788	8.8012	83.02	0.324258	28.4765	1.99204	0.539628	9.38541	0.121757	0.128944	0.0443756	41.0129	40.3936	0.619334	98.4899	0.176166	0.0197392	1.02363	133.53	9.11259	1.45149	26.6891	0.782623	0.8425	0.00523349
P-02-16-04	26	FOR	12	28	2 Bs/Bh	slope deposit with aeolian sand	granite/gneiss	C / W	F, M / F, A / W, S	SB, AB / FI, ME	C / V	10YR 4/6	48	37.669	98	21.199	346	1982	29	13.3719	6.55981	1.3	4.17988	0	12.452	19.258	68.29	3.12573	37.2657	2.57323	0.567163	15.1905	0.126585	0.659594	0.770076	60.2785	55.5965	4.68198	92.2328	0.437688	0.0322577	15.1963	269.115	18.1283	2.34945	66.5255	1.25307	6.63717	0.139867
P-02-16-05	26	FOR	5	12	BEhs	slope deposit with aeolian silt	granite/gneiss	C / W	F / A / W	SB, PL / FI, ME	C / F	10YR 3/4	48	37.669	98	21.199	346	1982	29	4.57563	1.98051	1.14702	3.99497	0	14.4342	28.9758	56.59	6.71352	44.8844	3.22895	0.575815	17.2767	0.277483	1.64931	1.34791	75.9541	65.9659	9.98822	86.8497	0.993267	0.0529348	13.8786	137.826	9.6727	1.01425	32.1725	1.16799	7.05691	0.1041
P-02-16-06	26	FOR	0	5	AE	slope deposit with aeolian silt	granite/gneiss	A / W	F / A / W	GR / FI	C / C	10YR 3/3	48	37.669	98	21.199	346	1982	29	4.38586	1.48954	0.9	3.87	0	15.8718	33.7782	50.35	11.3883	70.6047	4.22294	0.571529	23.3092	3.52308	2.51695	2.44233	118.579	98.7084	19.8706	83.2427	2.86884	0.137813	13.2208	121.752	7.10408	0.565338	24.3757	8.3278	6.04775	0.105925
P-02-17-01	27	FOR	34	58	2 Bw	slope deposit with aeolian sand	granite/gneiss	C / S	F, C / F, A / W	MA	V / N	10YR 5/4	48	37.697	98	21.184	356	1977	29	12.2961	6.03207	1.3	5.71988	0	9.30998	12.56	78.13	0.0661515	44.9649	2.06178	0.677397	4.02589	0.103989	0.0767659	0	51.9769	51.73	0.246906	99.525	0.224744	0.0225477	0.488403	493.121	22.0584	4.26139	26.7751	1.56327	1.17308	0
P-02-17-02	27	FOR	21	34	2 BEsh	slope deposit with aeolian sand	granite/gneiss	C / W	F, M / A / W	SB / FI, ME	V / N	10YR 4/4	48	37.697	98	21.184	356	1977	29	3.91771	1.92189	1.3	5.30988	0	14.0683	27.8417	58.09	0.0789321	57.538	3.14049	0.692927	8.65422	0.241635	0.103682	0	70.4498	70.0256	0.424249	99.3978	0.506076	0.0422681	0.34582	374.447	19.9382	2.58674	34.155	2.15557	0.940197	0
P-02-17-03	27	FOR	4	21	Behs	slope deposit with aeolian silt	granite/gneiss	C / W	F, C / A / W	SB,GR / FI	F / V	10YR 3/4	48	37.697	98	21.184	356	1977	29	4.36823	2.14287	1.29998	5.31497	0	14.9422	22.1178	62.94	0.117936	73.7515	3.60199	0.736563	16.4106	0.376984	0.0928206	0	95.0884	94.5007	0.587741	99.3819	0.96489	0.0578186	0.672513	624.69	29.7638	3.57876	84.2964	4.37708	1.09551	0
P-02-17-04	27	FOR	0	4	AE	slope deposit with aeolian silt	granite/gneiss	A / W	F / A / W	GR / FI	C / V	10YR 3/3	48	37.697	98	21.184	356	1977	29	3.89419	1.32255	0.9	4.66474	0	17.326	34.144	48.53	0.723035	117.217	3.7658	1.10636	24.4171	0.497835	0.433917	0.199334	148.36	146.506	1.85412	98.7503	3.39696	0.172334	0.674959	162.535	5.0941	0.880003	20.5325	0.94626	0.838385	0.00695175
P-02-18-01	28	FOR	60	80	3 C	slope deposit solifluction	granite/gneiss	- / -	F-S / F, A / W	SG	V / N	2.5Y 3/2	48	37.725	98	21.161	352	1957	24.5	70	39.6226	1.5	6.10474	0	6.90696	38.823	54.27	0.251248	78.0674	0.594121	0.839674	5.03549	0.0409441	0.24018	0	85.069	84.5367	0.532372	99.3742	0.449351	0.0276906	0.610114	281.591	2.09062	1.73735	11.0149	0.202445	1.20716	0
P-02-18-02	28	FOR	38	60	3 C	slope deposit solifluction	granite/gneiss	- / -	F-S / F, A / W	SG	V / N	2.5Y 3/2	48	37.725	98	21.161	352	1957	24.5	70	39.6226	1.5	5.43816	0	3.59003	22.99	73.42	0	79.8704	0.908306	1.4786	7.38896	0.0599881	0.0639996	0	89.7702	89.6463	0.123988	99.8619	0.328688	0.023681	0	316.904	3.51581	3.36527	17.7793	0.326267	0.353832	0
P-02-18-03	28	FOR	18	38	3 BC	slope deposit solifluction	granite/gneiss	C / S	F-S / F, A / W	MA	F / V	2.5Y 4/2	48	37.725	98	21.161	352	1957	24.5	35	17.1698	1.3	4.97988	0	2.98016	16.3698	80.65	0.622923	94.9374	1.79372	1.3382	17.0726	0.0691147	0.125734	0	115.96	115.142	0.817772	99.2948	0.560429	0.0343416	2.84045	643.029	11.8522	5.19928	70.1265	0.641697	1.18666	0
P-02-18-04	28	FOR	9	18	2 Bsh	slope deposit with aeolian sand	granite/gneiss	A / W	F, C / F, A / W	SB / FI	C / V	10YR 4/4	48	37.725	98	21.161	352	1957	24.5	17	8.33962	1.3	4.53954	0	11.3859	20.3541	68.26	1.54596	49.2626	1.87152	0.680005	12.0981	0.0637053	0.464309	0.197809	66.184	63.9122	2.27178	96.5675	0.509744	0.0338608	4.05068	191.729	7.10585	1.51814	28.5546	0.339869	2.518	0.0193629
P-02-18-05	28	FOR	0	9	BEhs	slope deposit with aeolian silt	granite/gneiss	A / W	F, M / A / W	GR, SB / ME FI	C / V	10YR 3/4	48	37.725	98	21.161	352	1957	24.5	6.79721	2.9227	1.13946	3.87	0	11.5015	28.9985	59.5	9.03318	46.5587	2.07408	0.781383	12.7262	0.453773	2.33237	2.03589	75.9955	62.1403	13.8552	81.7684	1.37461	0.0645434	23.2958	178.352	7.75092	1.717	29.564	2.38277	12.4495	0.196149
P-02-19-01	29	FOR	50	80	3 C	slope deposit solifluction	granite/gneiss	- / -	F-S / F, A / W	SG	V / N	2.5Y 4/2	48	37.768	98	21.135	353	1943	25.5	50	28.3019	1.5	6.00497	0	2.80358	35.1064	62.09	0.233812	107.695	0.625737	0.969172	6.0189	0.0301932	0.253595	0	115.826	115.309	0.5176	99.5531	0.583519	0.03214	1.41943	971.145	5.50468	5.01324	32.9151	0.373219	3.18645	0
P-02-19-02	29	FOR	28	50	3 C	slope deposit solifluction	granite/gneiss	- / -	F-S / F, A / W	SG	V / N	2.5Y 4/2	48	37.768	98	21.135	353	1943	25.5	50	28.3019	1.5	5.39988	0	3.99061	17.5694	78.44	0.22155	79.9791	1.36868	0.985449	9.65438	0.0328533	0.0848386	0	92.3269	91.9876	0.339242	99.6326	0.48514	0.0271385	0.986331	528.892	8.82965	3.73812	38.7172	0.297808	0.781739	0
P-02-19-03	29	FOR	19	28	3 BC	slope deposit solifluction	granite/gneiss	C / S	F, C / F, A / W	SG	F / N	10YR 5/4	48	37.768	98	21.135	353	1943	25.5	20	9.81132	1.3	4.55474	0	9.39037	28.3896	62.22	1.15916	58.9283	2.05657	0.96489	11.1683	0.0653008	0.213191	0.179257	74.7349	73.118	1.61691	97.8365	0.502574	0.0281406	2.92742	221.058	7.52621	2.07629	25.4073	0.33579	1.11437	0.0169126
P-02-19-04	29	FOR	10	19	2 Bw/Bs	slope deposit with aeolian sand	granite/gneiss	C / W	F, M / A / W	MA	F / V	10YR 4/3	48	37.768	98	21.135	353	1943	25.5	15	7.35849	1.3	3.97428	0	9.87447	21.8455	68.28	5.0437	51.5886	2.29079	1.55022	12.2182	0.125761	1.24686	1.34613	75.4103	67.6479	7.76244	89.7064	0.768396	0.0363349	13.5338	205.62	8.90734	3.54433	29.5331	0.687107	6.92479	0.134943
P-02-19-05	29	FOR	3	10	BEhs	slope deposit with aeolian silt	granite/gneiss	C / W	F, M / A / W	GR, SB / FI	C / F	10YR 3/4	48	37.768	98	21.135	353	1943	25.5	18.0512	6.47117	0.95	3.96474	0.0851246	15.6641	34.7459	49.59	7.30838	68.444	3.43901	0.786533	17.9086	1.16105	1.1064	1.74979	101.904	90.5781	11.3256	88.886	1.50332	0.0698139	10.7461	149.488	7.3275	0.985409	23.7203	3.47607	3.36714	0.0961191
P-02-19-06	29	FOR	0	3	AE	slope deposit with aeolian silt	granite/gneiss	C / W	F / A / W	GR / FI	C / C	10YR 3/3	48	37.768	98	21.135	353	1943	25.5	17.5838	5.97187	0.9	3.47497	0	10.9429	35.1871	53.87	12.7645	46.8108	2.91504	0.672063	14.791	0.160748	2.65797	4.44469	85.2168	65.1889	20.0279	76.4977	1.47786	0.067686	7.66384	41.7473	2.53617	0.343812	7.99962	0.196514	3.30302	0.0996961
P-02-20-01	30	FOR	48	70	3 C	slope deposit solifluction	granite/gneiss	- / -	F-S / F, A / W	SG	N / N	2.5Y 4/2	48	37.787	98	21.127	351	1915	15	50	28.3019	1.5	6.47428	0	3.76559	34.0744	62.16	0.195672	121.369	0.91239	1.03952	6.09578	0.0654467	0.295765	0	129.973	129.416	0.556884	99.5715	0.550631	0.0350897	0.871122	802.596	5.88603	3.94322	24.4461	0.59326	2.72531	0
P-02-20-02	30	FOR	35	48	3 BC	slope deposit solifluction	granite/gneiss	C / S	F, C / F, A / W	MA, SG	V / N	10YR 5/4	48	37.787	98	21.127	351	1915	15	40	19.6226	1.3	5.55474	0	8.42004	17.78	73.8	0.0778322	62.368	1.96468	0.79142	5.9872	0.0818603	0.0578808	0	71.3289	71.1113	0.217573	99.695	0.251971	0.0179498	0.212943	253.458	7.78911	1.84493	14.7556	0.45602	0.32776	0
P-02-20-03	30	FOR	11	35	2 Bh/Bs/Bw	slope deposit with aeolian sand	granite/gneiss	C / S	F-S / A / W	SB / FI, ME	F / N	10YR 5/3	48	37.787	98	21.127	351	1915	15	15	7.35849	1.3	4.83497	0	11.36	16	72.64	0.444478	50.704	2.15075	1.34478	9.29369	0.165439	0.114785	0	64.218	63.4932	0.724702	98.8715	0.356886	0.0281167	3.18046	538.917	22.3008	8.199	59.9042	2.41037	1.69998	0
P-02-20-04	30	FOR	2	11	Bh/Bs	slope deposit with aeolian silt	granite/gneiss	C / W	F / A / W	SB, AB, GR / FI, ME	C / V	10YR 3/4	48	37.787	98	21.127	351	1915	15	7.81542	3.72008	1.26138	4.37474	0	13.5605	34.4795	51.96	1.77158	73.7478	2.07551	0.65246	14.0906	0.685538	0.492254	0.537584	94.0533	90.5664	3.48695	96.2926	1.27204	0.07062	5.00234	309.316	8.49239	1.56977	35.8404	3.94141	2.87687	0.0567092
P-02-20-05	30	FOR	0	2	Ah	slope deposit with aeolian silt	granite/gneiss	A / W	F / A / W	GR / FI, ME	C / V	10YR 3/2	48	37.787	98	21.127	351	1915	15	2.65268	0.900911	0.9	3.80474	0	16.1497	39.9603	43.89	7.50603	167.329	2.93885	0.846666	30.1705	0.529922	3.54514	4.38818	217.254	201.285	15.9693	92.6495	8.47829	0.363393	3.54873	117.51	2.01341	0.34107	12.8492	0.51013	3.46907	0.0775072
P-03-01-00a	31	DNOR	80	100	3 Ck	slope deposit solifluction	granite/gneiss	- / -	F-S / S, F, A / S, W	SG	V / N	10YR 5/4	48	27.636	98	13.686	316	2046	22	95	53.7736	1.5	8.06713	1.57365	4.1192	16.4708	79.41	0.201143	346.203	1.07289	0.597985	7.51508	0.0323315	0.189222	0	355.811	355.389	0.422696	99.8812	0.512153	0.0248061	0.0814069	208.127	0.629221	0.206213	2.73981	0.0266434	0.158507	0
P-03-01-00b	31	DNOR	60	80	3 Ck	slope deposit solifluction	granite/gneiss	- / -	F-S / S, F, A / S, W	SG	V / N	10YR 5/4	48	27.636	98	13.686	316	2046	22	95	53.7736	1.5	7.95428	3.80105	8.50521	14.9448	76.55	0.261776	403.66	0.775775	0.596593	8.6349	0.0324068	0.29357	0	414.255	413.667	0.587752	99.8581	0.611601	0.0295995	0.105947	242.668	0.454972	0.205733	3.14807	0.0267055	0.245916	0
P-03-01-01	31	DNOR	38	60	2 Cw	slope deposit with aeolian sand	granite/gneiss	G / W	F-C / A, S / W, S	SG	F / N	10YR 5/4	48	27.636	98	13.686	316	2046	22	75	42.4528	1.5	7.32428	0.081288	3.63416	30.6458	65.72	0.517924	118.029	0.626656	1.21058	8.34099	0.138426	0.354498	0	129.218	128.207	1.01085	99.2177	0.940679	0.0307668	1.15288	390.255	2.02135	2.29606	16.725	0.6274	1.63325	0
P-03-01-02	31	DNOR	16	38	2 Bw 2	slope deposit with aeolian sand	granite/gneiss	C / W	F-C / F, A / F, W	SG, SB / FI	F / N	10YR 5/3	48	27.636	98	13.686	316	2046	22	25	12.2642	1.3	5.17954	0	9.71686	30.0131	60.27	0.637863	69.3266	1.88871	0.576929	10.2421	0.229912	0.125702	0	83.0279	82.0344	0.993477	98.8034	0.723506	0.0431701	3.69165	595.982	15.8398	2.84502	53.3965	2.70933	1.50575	0
P-03-01-03	31	DNOR	7	16	Bw 1	colluvium	granite/gneiss	C / W	F, M / A / F, W	SG, SB / FI	F / N	7.5YR 4/3	48	27.636	98	13.686	316	2046	22	5.01207	2.03698	1.077	4.64954	0	19.0545	37.5655	43.38	1.47707	75.5673	4.51501	0.207714	16.5701	0.820962	0.243145	0	99.4012	96.8601	2.54118	97.4435	1.39687	0.0925525	3.6694	278.847	16.2534	0.43967	37.0806	4.15262	1.25019	0
P-03-01-04	31	DNOR	0	7	Ah	colluvium	granite/gneiss	C / S	- / - / -	SG, GR / VF	C / F	10YR 2/2	48	27.636	98	13.686	316	2046	22	3.26218	1.29256	1.05	5.20954	0	NA	NA	NA	0.524223	281.387	12.7026	0.483583	87.423	6.27009	0.136202	0	388.927	381.996	6.93052	98.218	11.7714	0.67121	1.00569	801.852	35.3129	0.790478	151.079	24.4924	0.540817	0
P-03-02-00	32	DNOR	50	80	3 Cw 2	slope deposit solifluction	granite/gneiss	- / -	F-S / F, A, S / W, S	SG	F / N	10YR 4/4	48	27.64	98	13.73	344	2055	25.5	85	48.1132	1.5	6.31954	0	3.948	20.502	75.55	0.691737	75.945	0.844021	0.613918	5.99102	0.0901279	0.319114	0	84.4949	83.3939	1.10098	98.697	0.539339	0.0361522	1.25983	205.451	2.22749	0.952686	9.82879	0.334223	1.20291	0
P-03-02-01	32	DNOR	25	50	2 Cw 1	slope deposit with aeolian sand	granite/gneiss	G / W	F-C / A, S / W, S	SG	F / N	10YR 4/4	48	27.64	98	13.73	344	2055	25.5	30	15.4886	1.36816	5.31428	0	4.91083	25.8392	69.25	1.02745	43.955	1.07447	0.573021	8.33663	0.0766104	0.230777	0	55.274	53.9391	1.33484	97.585	0.403968	0.0286651	6.63747	421.783	10.0583	3.15414	48.5133	1.00771	3.08568	0
P-03-02-02	32	DNOR	16	25	Bw 2	colluvium	granite/gneiss	C / S	F / A, S / S	SG, SB / FI	C / V	10YR 4/4	48	27.64	98	13.73	344	2055	25.5	4.6933	2.18566	1.2341	4.76428	0	14.1348	28.9252	56.94	1.45641	64.355	3.43179	0.476535	15.7825	0.18057	0.235051	0	85.9178	84.0458	1.87203	97.8211	0.829247	0.0486343	4.15974	273.026	14.2035	1.1597	40.6057	1.05011	1.38951	0
P-03-02-03	32	DNOR	9	16	Bw 1	colluvium	granite/gneiss	C / W	F / A, S / S	SG, SB / FI	C / V	10YR 3/4	48	27.64	98	13.73	344	2055	25.5	1.88428	0.924362	1.3	4.87954	0	16.7915	33.8985	49.31	0.934877	69.2257	5.0062	0.262427	19.6914	3.21234	0.190364	0	98.5233	94.1857	4.33758	95.5974	1.35904	0.0955971	2.25217	247.716	17.4762	0.538671	42.7319	15.757	0.949183	0
P-03-02-04	32	DNOR	0	9	Ah	colluvium	granite/gneiss	A / S	- / - / -	GR / VF	C / V	10YR 2/2	48	27.64	98	13.73	344	2055	25.5	1.89157	0.74949	1.05	5.15474	0	NA	NA	NA	0.551483	272.626	12.2229	0.420598	73.2	6.24246	0.145301	0	365.408	358.469	6.93925	98.101	12.313	0.757018	1.37955	1013	44.3066	0.896481	164.947	31.7956	0.752299	0
P-03-03-00a	33	DWIR	60	80	3 Cw	slope deposit solifluction	granite/gneiss	- / -	F-B / F, A / F, W, S	SG	F / N	10YR 5/4	48	27.549	98	13.576	312	2055	25	85	48.1132	1.5	7.60359	3.84509	6.24092	35.0491	58.71	0.24154	395.679	1.52182	0.51522	8.13023	0.0756306	0.254776	0	406.419	405.847	0.571946	99.8593	0.726451	0.0538251	0.293269	713.612	2.67753	0.533016	8.89224	0.186975	0.640258	0
P-03-03-00b	33	DWIR	40	60	3 Cw	slope deposit solifluction	granite/gneiss	- / -	F-B / F, A / F, W, S	SG	F / N	10YR 5/4	48	27.549	98	13.576	312	2055	25	85	48.1132	1.5	7.17153	0.0934376	3.5776	36.8224	59.6	0.254163	226.942	1.44049	0.373847	8.10384	0.149876	0.209783	0	237.474	236.86	0.613822	99.7415	0.63251	0.044099	0.308597	409.292	2.53443	0.38676	8.86337	0.370525	0.52719	0
P-03-03-01	33	DWIR	20	40	2 Bw 2	slope deposit with aeolian sand	granite/gneiss	C / W	F-S / F, A / F, W, S	SG, SB / VF	V / V	10YR 5/3	48	27.549	98	13.576	312	2055	25	25	13.1334	1.39214	5.21896	0	10.4032	20.1668	69.43	0.679011	47.461	2.606	0.253299	7.87437	0.188624	0.106688	0	59.169	58.1946	0.974323	98.3533	0.354518	0.0261099	3.82576	397.207	21.2768	1.21603	39.9655	2.16394	1.24415	0
P-03-03-02	33	DWIR	10	20	Bw 1	colluvium	granite/gneiss	C / W	F-C / A / F	SG, SB / VF	F / V	10YR 4/4	48	27.549	98	13.576	312	2055	25	6.2967	2.54415	1.07072	4.72954	0	18.1026	33.1474	48.75	1.33456	76.5892	4.97803	0.239263	16.089	0.846435	0.154337	0	100.231	97.8955	2.33533	97.67	0.899574	0.0683109	3.61271	307.967	19.5275	0.551877	39.2334	4.66549	0.86474	0
P-03-03-03	33	DWIR	0	10	Ah	colluvium	granite/gneiss	A / S	- / - / -	SG	C / V	10YR 2/2	48	27.549	98	13.576	312	2055	25	1.48047	0.5866	1.05	5.18474	0	24.1024	46.9976	28.9	0.513126	332.13	11.2944	0.460262	71.444	5.43734	0.179917	0	421.459	415.329	6.13038	98.5454	13.4704	0.79144	1.43219	1376.98	45.6805	1.09459	179.628	30.9009	1.03937	0
P-03-04-00a	34	DWIR	70	90	3 Cw 3	slope deposit solifluction	granite/gneiss	- / -	F-B / F-S / F-S	SG	V / N	10YR 5/4	48	27.595	98	13.723	332	2079	32.5	90	50.9434	1.5	7.79587	5.2375	4.78686	24.7231	70.49	0.202221	468.34	0.713333	1.36033	7.52757	0.031555	0.232722	0	478.408	477.941	0.466498	99.9025	0.632991	0.0385671	0.163687	563.104	0.836703	0.938209	5.48873	0.052007	0.389891	0
P-03-04-00b	34	DWIR	50	70	2 Cw 2	slope deposit solifluction	granite/gneiss	- / -	F-B / F-S / F-S	SG	V / N	10YR 5/4	48	27.595	98	13.723	332	2079	32.5	90	50.9434	1.5	7.57896	5.42293	4.30051	41.6095	54.09	0.319086	490.401	0.698689	1.4581	6.4977	0.0542159	0.344504	0	499.773	499.055	0.717805	99.8564	1.62416	0.0720949	0.258282	589.628	0.819527	1.00564	4.73779	0.0893554	0.577165	0
P-03-04-01	34	DWIR	20	50	2 Cw 1	slope deposit with aeolian sand	granite/gneiss	G / W	F-B / F, A / F, W, S	SG	V / V	10YR 5/3	48	27.595	98	13.723	332	2079	32.5	60	29.434	1.3	5.1	0	4.82204	40.208	54.97	0.663616	66.7683	0.758354	0.691013	6.4746	0.215633	0.136689	0	75.7082	74.6923	1.01594	98.6581	0.420648	0.0277355	2.79323	417.447	4.62546	2.47826	24.549	1.84805	1.19081	0
P-03-04-02	34	DWIR	13	20	Bw 2	colluvium	granite/gneiss	C / W	F, M / F, A / F	SB, SG / VF	C / V	7.5YR 4/4	48	27.595	98	13.723	332	2079	32.5	6.64281	3.25874	1.3	4.60954	0.547192	19.7386	30.2114	50.05	2.02108	79.3002	2.53898	0.524642	21.9467	0.470627	0.2267	0	107.029	104.311	2.7184	97.4601	1.04651	0.0666989	4.63274	270.004	8.43345	1.02468	45.3162	2.19654	1.07554	0
P-03-04-03	34	DWIR	7	13	Bw 1	colluvium	granite/gneiss	C / W	- / - / -	SB, SG / VF	C / F	10YR 4/3	48	27.595	98	13.723	332	2079	32.5	5.65027	2.77183	1.3	5.21954	0.554424	22.3965	32.9635	44.64	0.377899	123.197	5.21107	0.326842	35.4745	3.8531	0.105457	0	168.545	164.209	4.33645	97.4271	3.10799	0.194316	0.750373	363.362	14.9941	0.552978	63.4523	15.5782	0.433406	0
P-03-04-04	34	DWIR	0	7	Ah	colluvium	granite/gneiss	C / W	- / - / -	SG, GR / FI	C / V	10YR 2/1	48	27.595	98	13.723	332	2079	32.5	4.97251	1.97024	1.05	6.75428	0	22.746	46.884	30.37	0.219841	362.726	18.5974	0.433995	100.633	3.60437	0.128022	0	486.342	482.39	3.95223	99.1874	13.4561	0.723196	0.414297	1015.36	50.7862	0.696878	170.833	13.8305	0.499351	0
P-03-05-01	35	DWIR	65	90	2 Ck	slope deposit with aeolian sand	granite/gneiss	- / -	F-B / F, A / W, S, F	SG	V / N	10YR 5/4	48	27.597	98	10.886	322	2077	26.5	90	50.9434	1.5	7.88015	3.9838	10.6026	16.6974	72.7	0.177573	422.761	1.05381	0.426634	9.95556	0.106087	0.116735	0	434.597	434.197	0.400395	99.9079	0.79365	0.0430634	0.179669	635.378	1.54509	0.367809	9.07387	0.218557	0.244465	0
P-03-05-02	35	DWIR	45	65	2 Cw	slope deposit with aeolian sand	granite/gneiss	G / W	F-B / F, A / F, W	SG	F / N	10YR 5/4	48	27.597	98	10.886	322	2077	26.5	60	33.9623	1.5	7.47988	2.95309	7.39997	16.66	75.94	0.196436	195.923	1.35964	0.23322	6.67847	0.198319	0.0897632	0	204.679	204.195	0.484519	99.7633	0.35381	0.0340747	0.636017	942.265	6.37914	0.643401	19.4784	1.30743	0.601539	0
P-03-05-03	35	DWIR	25	45	2 Cw	slope deposit with aeolian sand	granite/gneiss	G / W	F-B / F, A / F, W	SG	F / N	10YR 5/4	48	27.597	98	10.886	322	2077	26.5	60	33.9623	1.5	5.78359	0	9.71514	12.1349	78.15	0.30178	65.9685	1.35655	0.360025	5.5154	0.133337	0.0686086	0	73.7042	73.2005	0.503725	99.3166	0.274909	0.0207752	0.977097	317.266	6.36464	0.993229	16.0862	0.879032	0.459774	0
P-03-05-04	35	DWIR	15	25	2 Bw 2	slope deposit with aeolian sand	granite/gneiss	C / W	F, M / A / W	GR, SG / FI	F / V	10YR 4/3	48	27.597	98	10.886	322	2077	26.5	8.13625	3.54415	1.15434	5.54896	0.157761	17.2776	21.2224	61.5	0.299142	97.8696	2.8969	0.269044	14.1137	0.154908	0.0859066	0	115.689	115.149	0.539956	99.5333	1.02914	0.0515641	0.855896	415.941	12.0107	0.655899	36.376	0.902452	0.508732	0
P-03-05-05	35	DWIR	7	15	Bw 1	colluvium	granite/gneiss	C / W	F / A / W	SB / VF	C / F	10YR 3/3	48	27.597	98	10.886	322	2077	26.5	5.46512	2.07774	1.00748	5.44954	0	17.9193	34.2307	47.85	0.223879	148.691	4.95515	0.373447	30.3531	1.22564	0.0847124	0	185.906	184.372	1.53423	99.1747	2.76839	0.141145	0.460254	454.054	14.7616	0.654158	56.2104	5.13042	0.360454	0
P-03-05-06	35	DWIR	0	7	Ah	colluvium	granite/gneiss	C / W	- / - / -	GR, SG / FI	M / F	10YR 2/2	48	27.597	98	10.886	322	2077	26.5	2.94729	1.16779	1.05	5.67359	0.176036	21.5531	37.4969	40.95	0.400301	316.167	11.4927	0.34236	84.7177	6.50517	0.206532	0	419.832	412.72	7.112	98.306	12.6306	0.666289	0.770455	903.894	32.0535	0.561453	146.881	25.4933	0.822748	0
P-03-06-01	36	DWIR	70	100	2 BC 2	slope deposit with aeolian sand	granite/gneiss	- / -	F-B / A / W	SG	V / N	10YR 6/4	48	27.609	98	10.914	320	2069	29.5	90	50.9434	1.5	7.54954	0.889411	5.16979	17.5502	77.28	0.15054	89.4104	0.827937	0.249038	3.72652	0.0481603	0.0642658	0	94.4769	94.2139	0.262966	99.7217	0.194515	0.022176	0.18278	161.253	1.45669	0.25764	4.07578	0.119062	0.161502	0
P-03-06-02	36	DWIR	43	70	2 BC 2	slope deposit with aeolian sand	granite/gneiss	- / -	F-B / A / W	SG	V / N	10YR 6/4	48	27.609	98	10.914	320	2069	29.5	90	50.9434	1.5	5.42359	0.159646	5.65072	10.6893	83.66	0.437651	35.3437	0.874177	0.304313	5.07157	0.0895702	0.0628362	0	42.1838	41.5938	0.590058	98.6012	0.144048	0.0159183	0.478244	57.3685	1.38424	0.283342	4.99221	0.199293	0.142118	0
P-03-06-03	36	DWIR	28	43	2 BC 1	slope deposit with aeolian sand	granite/gneiss	C / W	F-S / A / W	SG	F / N	10YR 6/4	48	27.609	98	10.914	320	2069	29.5	40	22.6415	1.5	4.71428	0.488765	10.3244	12.4156	77.26	1.18122	43.5734	1.33317	0.301793	10.2976	0.133911	0.183673	0	57.0048	55.506	1.4988	97.3707	0.263519	0.0269252	4.30259	235.755	7.03685	0.936653	33.7881	0.993165	1.38472	0
P-03-06-04	36	DWIR	15	28	2 Bw 2	slope deposit with aeolian sand	granite/gneiss	C / W	F-S / A / W	SB, SG / VF	C / V	10YR 5/3	48	27.609	98	10.914	320	2069	29.5	40	19.6226	1.3	4.55954	0.458123	12.7842	15.1358	72.08	1.44975	55.7491	1.96101	0.342679	13.7245	0.205395	0.231917	0.036085	73.7005	71.7773	1.92315	97.3906	0.416167	0.0325131	3.96641	226.559	7.77456	0.798842	33.8244	1.1442	1.31327	0.0036883
P-03-06-05	36	DWIR	6	15	Bw 1	colluvium	granite/gneiss	C / S	F / A / W	SB, SG / ME	C / V	10YR 4/3	48	27.609	98	10.914	320	2069	29.5	9.00114	3.88679	1.1443	4.64988	0.527667	20.3199	24.0801	55.6	1.24441	84.4595	3.95163	0.29243	23.1065	0.764403	0.228987	0	114.048	111.81	2.2378	98.0378	1.45591	0.0840323	3.14665	317.229	14.4794	0.630051	52.6318	3.93563	1.19843	0
P-03-06-06	36	DWIR	0	6	Ah	colluvium	granite/gneiss	A / S	F / A / W	GR / FI	M / V	10YR 2/3	48	27.609	98	10.914	320	2069	29.5	2.84552	1.12747	1.05	5.42428	0	25.6553	41.6947	32.65	0.284329	325.794	24.4968	0.351282	122.79	18.7273	0.0886805	0	492.532	473.432	19.1003	96.122	18.3197	0.868248	0.46956	799.195	58.6234	0.494304	182.667	62.9726	0.303121	0
P-04-01-01	37	DWIR	80	110	2 Cw	slope deposit with aeolian sand	granite/gneiss	- / -	F-B / A / W, S	SG	V / N	10YR 5/4	48	28.784	98	19.246	324	2088	35	75	42.4528	1.5	4.86359	0.444689	1.91921	15.7908	82.29	0.576759	72.7253	0.712732	1.88034	8.71939	0.081719	0.0678882	0	84.7641	84.0377	0.726366	99.1431	0.141643	0.0223186	1.7507	327.902	3.13499	4.86322	23.8415	0.505066	0.426512	0
P-04-01-02	37	DWIR	50	80	2 Cw	slope deposit with aeolian sand	granite/gneiss	- / -	F-B / A / W, S	SG	V / N	10YR 5/4	48	28.784	98	19.246	324	2088	35	75	42.4528	1.5	4.27954	0.360729	3.51594	22.0041	74.48	2.59162	70.1875	0.636066	1.48053	6.63463	0.283177	0.115324	0.176261	82.1051	78.9388	3.16638	96.1435	0.302412	0.0292806	7.86665	316.46	2.79778	3.82918	18.1412	1.75018	0.724533	0.019988
P-04-01-03	37	DWIR	30	50	2 BC	slope deposit with aeolian sand	granite/gneiss	G / S	F-S / A / W	SG, SB / FI	F / N	10YR 4/4	48	28.784	98	19.246	324	2088	35	25	14.1509	1.5	4.59428	0.313294	4.78535	13.1446	82.07	2.86358	47.0976	0.828844	0.523367	6.72983	0.471183	0.178646	0	58.6931	55.1797	3.51341	94.0139	0.454499	0.0315051	17.3843	424.705	7.29144	2.70722	36.8029	5.82432	2.24471	0
P-04-01-04	37	DWIR	12	30	Bw 2	colluvium with aeolian silt	granite/gneiss	A / S	F / A / W	SB / ME, CO	F / V	10YR 4/6	48	28.784	98	19.246	324	2088	35	5	2.54038	1.3464	4.51954	0.423794	10.9805	13.4495	75.57	3.76606	55.5033	1.21375	0.391086	9.86935	0.242023	0.464704	0.0936343	71.5439	66.9775	4.56642	93.6173	0.896872	0.0526814	23.395	512.147	10.9259	2.07004	55.2274	3.06126	5.9749	0.0217303
P-04-01-05	37	DWIR	5	12	Bw 1	colluvium with aeolian silt	granite/gneiss	C / W	F / A / W	SB / CO	C / F	10YR 3/4	48	28.784	98	19.246	324	2088	35	3	1.25457	1.1082	5.01954	0.417817	13.4639	20.5461	65.99	0.638992	95.7391	2.13987	0.341828	23.8566	0.392615	0.176305	0	123.285	122.077	1.20791	99.0202	1.58844	0.0965219	1.29733	288.724	6.29556	0.591332	43.6307	1.62303	0.740862	0
P-04-01-06	37	DWIR	0	5	Ah	colluvium with aeolian silt	granite/gneiss	A / W	F / A / W	SB, GR / ME, VF	C / V	10YR 2/1	48	28.784	98	19.246	324	2088	35	7.3498	3.32821	1.2	7.15267	0.206126	14.1749	34.4251	51.4	0.175617	233.623	9.85242	0.340079	35.9575	7.96895	0.0753044	0	287.993	279.773	8.21987	97.1458	3.52681	0.310245	0.263408	520.499	21.414	0.434623	48.5828	24.3372	0.233777	0
P-04-02-01	38	DNOR	80	100	3 Cw 2	slope deposit 2 solifluction	granite/gneiss	- / -	F-S / A / W	SG	N / N	10YR 5/4	48	28.79	98	19.074	328	2004	41	40	22.6415	1.5	6.59359	0	3.96433	8.94567	87.09	0.146594	51.3793	1.23145	0.344531	5.47263	0.170659	0.0667344	0	58.8119	58.4279	0.383988	99.3471	0.243655	0.0229968	0.711961	370.652	8.66656	1.42572	23.9422	1.68762	0.67082	0
P-04-02-02	38	DNOR	50	80	2 Cw 1	slope deposit solifluction	granite/gneiss	G / W	F-B / F, A / W, S	SG	V / N	10YR 5/4	48	28.79	98	19.074	328	2004	41	80	45.283	1.5	6.77359	0.0791689	2.58755	3.27245	94.14	0.278678	43.7392	0.969269	0.230938	4.29064	0.21879	0.117431	0	49.8449	49.23	0.614899	98.7664	0.261049	0.0223306	0.676724	157.768	3.41071	0.477829	9.38557	1.08179	0.590212	0
P-04-02-03	38	DNOR	20	50	BCh	colluvium	granite/gneiss	A / W	F, M / A / W	SB, SG / ME	V / N	10YR 4/4	48	28.79	98	19.074	328	2004	41	3.14694	1.64377	1.3842	6.48438	0	7.35263	6.93737	85.71	0.255361	83.3668	1.8535	0.234617	8.84027	0.331962	0.183764	0	95.0663	94.2952	0.771087	99.1889	0.922503	0.0454494	2.77111	1343.79	29.1464	2.16934	86.4161	7.33491	4.12742	0
P-04-02-04	38	DNOR	4	20	Bh	colluvium	granite/gneiss	C / W	F, C / A / W	SB	C / F	10YR 3/3	48	28.79	98	19.074	328	2004	41	1.65203	0.536604	0.86076	6.20428	0	11.9416	20.6584	67.4	0.376634	202.036	3.60935	0.328354	26.0388	0.518647	0.142613	0	233.051	232.013	1.03789	99.5546	3.94321	0.208359	1.37643	1096.74	19.1141	1.02246	85.7202	3.85933	1.07873	0
P-04-02-05	38	DNOR	0	4	Ah	colluvium	granite/gneiss	A / W	F / A / W	GR, SB / ME, FI	C / V	10YR 2/2	48	28.79	98	19.074	328	2004	41	1.64414	0.65145	1.05	7.33896	0.467261	15.1223	28.4277	56.45	0.177792	424.276	7.59876	0.445465	56.8965	0.827264	0.0834592	0	490.305	489.216	1.08852	99.778	5.04323	0.372776	0.198166	702.431	12.273	0.423056	57.1256	1.87744	0.192534	0
P-04-03-01	39	DNOR	85	115	3 C 2	slope deposit solifluction	granite/gneiss	- / -	F-S / F, A / W	SG	N / N	10YR 5/4	48	28.732	98	18.98	328	2018	36	50	30.1887	1.6	6.14359	0	3.87201	5.03799	91.09	0.187525	31.1682	1.5071	0.300453	6.06768	0.046361	0.048831	0	39.3261	39.0434	0.282717	99.2811	0.0524772	0.026563	1.21433	299.798	14.142	1.65776	35.394	0.611276	0.654472	0
P-04-03-02	39	DNOR	55	85	3 C 1	slope deposit solifluction	granite/gneiss	- / -	F-B / F, A / W	SG	V / N	10YR 5/4	48	28.732	98	18.98	328	2018	36	80	48.3019	1.6	5.54359	0	3.04446	5.88554	91.07	0.295391	27.5398	1.14355	0.364939	5.23195	0.0366139	0.0508749	0	34.6631	34.2802	0.38288	98.8954	0.0870854	0.0205377	0.765128	105.959	4.29224	0.805427	12.2076	0.193104	0.272746	0
P-04-03-03	39	DNOR	45	55	2 Cw	slope deposit with aeolian sand	granite/gneiss	G / W	F-C / F, A / W, S	SG	F / N	10YR 5/4	48	28.732	98	18.98	328	2018	36	30	16.9811	1.5	5.45954	0	2.69701	3.16299	94.14	0.386262	19.7442	0.787032	0.251904	3.26517	0.0333583	0.0667245	0	24.5347	24.0483	0.486345	98.0177	0.0806796	0.0222203	1.0943	83.0873	3.23102	0.60808	8.33281	0.192427	0.391254	0
P-04-03-04	39	DNOR	22	45	BC	colluvium	granite/gneiss	C / S	F, M / A / W	SB, SG / FI	F / N	10YR 5/6	48	28.732	98	18.98	328	2018	36	3.52564	1.99565	1.5	5.28896	0	6.86204	6.88796	86.25	0.22971	37.0881	1.11538	0.304752	7.6813	0.120637	0.0682351	0	46.6082	46.1896	0.418582	99.1019	0.300744	0.0253653	2.06289	494.734	14.5148	2.33192	62.1386	2.20589	1.2683	0
P-04-03-05	39	DNOR	12	22	Bw 2	colluvium	granite/gneiss	C / W	F / A / W	SB / ME	C / V	10YR 3/4	48	28.732	98	18.98	328	2018	36	4.249	2.24604	1.4008	5.12428	0	10.0333	8.54673	81.42	0.163591	49.6485	1.53859	0.216253	12.9309	0.661964	0.115069	0	65.2749	64.3343	0.940624	98.559	0.568158	0.0417521	0.592031	266.89	8.06865	0.666833	42.1546	4.87783	0.861912	0
P-04-03-06	39	DNOR	5	12	Bw 1	colluvium	granite/gneiss	C / W	F / A / W	SB / CO, ME	C / V	10YR 2/3	48	28.732	98	18.98	328	2018	36	2.24208	1.02642	1.21316	5.39896	0	13.1583	20.7817	66.06	0.170205	78.9576	2.58104	0.285232	20.7244	0.664988	0.0560981	0	103.44	102.548	0.891291	99.1383	1.20931	0.0922077	0.381248	262.705	8.37763	0.54438	41.8164	3.03287	0.260076	0
P-04-03-07	39	DNOR	0	5	Ah	colluvium	granite/gneiss	A / W	F / A / W	SB, GR / CO, FI	F / V	10YR 2/1	48	28.732	98	18.98	328	2018	36	2.3549	1.06637	1.2	7.15428	0.0528963	14.7982	25.9818	59.22	0.00693583	181.13	6.72545	0.322734	34.4302	0.946683	0.0235907	0	223.586	222.609	0.97721	99.5629	2.22915	0.186006	0.0109639	425.303	15.4057	0.434692	49.0272	3.04705	0.0771841	0
P-04-04-01	40	DNOR	70	100	3 Cw	slope deposit solifluction	granite/gneiss	- / -	F-B / A / W	SG	V / N	10YR 5/4	48	28.335	98	19.14	320	2040	36.5	35	21.1321	1.6	4.74988	0	4.93589	7.11411	87.95	0.723958	34.0303	1.43716	0.195958	8.59927	0.108034	0.131722	0	45.2264	44.2627	0.963714	97.8691	0.171447	0.0226946	6.09444	425.526	17.5314	1.40557	65.2097	1.85178	2.29508	0
P-04-04-02	40	DNOR	45	70	2 Cw	slope deposit with aeolian sand	granite/gneiss	G / S	F-B / A / W	SG	V / N	10YR 5/4	48	28.335	98	19.14	320	2040	36.5	80	45.283	1.5	4.67954	0	2.44409	2.32591	95.23	0.596208	15.4799	1.1472	0.224299	3.94416	0.046741	0.131137	0	21.5696	20.7955	0.774086	96.4112	0.121981	0.0158056	1.20649	46.5302	3.36403	0.386744	7.18971	0.192589	0.549252	0
P-04-04-03	40	DNOR	30	45	BC	colluvium	granite/gneiss	C / S	F-S / A / W	SG, SB / VF	F / N	10YR 5/6	48	28.335	98	19.14	320	2040	36.5	4.41798	2.16731	1.3	4.31474	0	4.86056	4.05944	91.08	1.91227	18.0985	1.30289	0.148597	6.07618	0.0646536	0.329385	0.16159	28.0941	25.6262	2.4679	91.2156	0.373483	0.0286825	9.61672	135.195	9.4946	0.63673	27.5256	0.662028	3.42846	0.0303589
P-04-04-04	40	DNOR	20	30	Bw 2	colluvium	granite/gneiss	C / W	F, M / A / W	SB, SG / FI, ME	C / N	10YR 4/5	48	28.335	98	19.14	320	2040	36.5	3.83558	2.02189	1.39692	4.25954	0	7.71261	7.32739	84.96	1.96289	25.7246	1.58401	0.14596	10.3783	0.0212275	0.570584	0.3301	40.7176	37.8328	2.88481	92.9151	0.473025	0.0340576	7.11457	138.497	8.31959	0.450769	33.8849	0.15666	4.28045	0.0446983
P-04-04-05	40	DNOR	5	20	Bw 1	colluvium	granite/gneiss	C / W	F, M / A / W	SB / ME	C / N	10YR 4/4	48	28.335	98	19.14	320	2040	36.5	5.19106	2.59698	1.32574	4.26474	0	9.35238	9.67762	80.97	1.11202	37.3192	1.93589	0.155364	14.1562	0.0715348	0.478998	0.412328	55.6415	53.5666	2.07488	96.271	0.736869	0.0491063	5.65689	281.992	14.2704	0.673418	64.8697	0.74095	5.04333	0.0783614
P-04-04-06	40	DNOR	0	5	Ah	colluvium	granite/gneiss	A / S	F, M / A / W	GR / ME	C / N	10YR 2/1	48	28.335	98	19.14	320	2040	36.5	1.3401	0.606838	1.2	7.39359	0.994918	9.79935	34.2906	55.91	0	375.942	20.5524	0.39279	46.1974	2.28595	0.0296053	0	445.4	443.084	2.31556	99.4801	4.53846	0.485644	0	891.905	47.5677	0.534548	66.4668	7.43416	0.0978693	0
P-04-05-01	41	DWIR	80	110	3 Cw 2	slope deposit solifluction	granite/gneiss	- / -	F-B / A / W, S	SG	V / N	10YR 6/4	48	28.345	98	19.228	330	2053	42.5	50	30.1887	1.6	5.23954	0	4.11533	7.48467	88.4	0.350076	31.5209	0.947688	0.346188	6.08972	0.0389745	0.0621791	0	39.3557	38.9045	0.451229	98.8535	0.0775813	0.0136191	2.26694	303.191	8.89271	1.91011	35.5226	0.513884	0.833374	0
P-04-05-02	41	DWIR	50	80	2 Cw	slope deposit with aeolian sand	granite/gneiss	G / W	F-B / A / W, S	SG	V / N	10YR 6/4	48	28.345	98	19.228	330	2053	42.5	50	30.1887	1.6	4.84474	0	3.96662	6.99338	89.04	0.765084	18.5597	0.9069	0.176361	3.41949	0.0469959	0.0686028	0	23.9432	23.0625	0.880683	96.3218	0.0767338	0.0161192	4.95435	178.521	8.50998	0.97308	19.9466	0.619647	0.91947	0
P-04-05-03	41	DWIR	25	50	2 BC	slope deposit with aeolian sand	granite/gneiss	G / W	F-B / A / W	SG	F / N	10YR 5/4	48	28.345	98	19.228	330	2053	42.5	50	28.3019	1.5	4.43988	0	2.2384	3.7416	94.02	1.82761	13.2665	0.937866	0.210431	3.13523	0.110415	0.206456	0	19.6945	17.55	2.14448	89.1113	0.12254	0.0162143	9.24594	99.6928	6.87543	0.90708	14.2878	1.13737	2.16178	0
P-04-05-04	41	DWIR	12	25	Bw 2	colluvium	granite/gneiss	C / W	F, M / A / W	SB, SG / ME	M / V	10YR 4/4	48	28.345	98	19.228	330	2053	42.5	6.03933	3.13585	1.37598	4.08988	0	5.89701	5.16299	88.94	4.59821	18.2698	1.36224	0.117536	5.98959	0.0554054	0.883662	0.590304	31.8668	25.7392	6.12758	80.7713	0.452162	0.0291271	20.8524	123.067	8.95186	0.454158	24.4678	0.511595	8.29415	0.100009
P-04-05-05	41	DWIR	4	12	Bw 1	colluvium	granite/gneiss	C / W	F / A / W	GR, SB / ME	M / V	10YR 3/4	48	28.345	98	19.228	330	2053	42.5	4.26476	1.54491	0.95996	4.03474	0	14.4214	20.4986	65.08	10.0494	48.1839	2.83557	0.494001	14.1424	0.500909	1.50226	1.04094	78.7494	65.6559	13.0935	83.3732	1.86063	0.103134	19.9353	141.979	8.15103	0.834984	25.2716	2.02324	6.16801	0.0771439
P-04-05-06	41	DWIR	0	4	Ah	colluvium	granite/gneiss	A / S	F / A / W	GR / ME	C / V	10YR 2/1	48	28.345	98	19.228	330	2053	42.5	3.93766	1.5602	1.05	5.62954	0.0881167	23.9017	28.6183	47.48	0.143248	212.943	13.9348	0.32626	58.0396	4.83696	0.0675919	0	290.291	285.243	5.0478	98.2611	7.56172	0.502659	0.15594	344.327	21.9818	0.302623	56.9144	10.7213	0.152294	0
P-05-01-01	42	DNOR	80	110	2 Ck	slope deposit with aeolian sand	granite	- / -	F-S / A / W, S	SB SG / VF	V / N	2.5YR 4/2	48	33.181	98	13.362	330	1893	23	50	30.1887	1.6	8.04428	3.70211	4.22685	12.8331	82.94	0.0609565	472.359	2.58617	8.65949	27.8831	0.0523749	0.170438	0	511.772	511.488	0.28377	99.9446	0.373451	0.0232334	0.394727	4543.49	24.2676	47.7792	162.647	0.690569	2.28435	0
P-05-01-02	42	DNOR	60	80	2 BCk	slope deposit with aeolian sand	granite	G / W	F-S / A / W, S	SB, SG / ME	V / N	10YR 5/3	48	33.181	98	13.362	330	1893	23	9.60924	5.8018	1.6	8.25713	7.42488	7.94521	7.21479	84.84	0.113252	495.656	1.61443	7.29475	28.117	0.0540835	0.258189	0	533.108	532.683	0.425525	99.9202	0.752071	0.0436153	0.883869	5745.94	18.258	48.5087	197.669	0.859433	4.17057	0
P-05-01-03	42	DNOR	40	60	2 Bw	slope deposit with aeolian sand	granite	G / W	F-C / A / W	SB, SG / ME	F / N	10YR 4/3	48	33.181	98	13.362	330	1893	23	10	5.66038	1.5	7.83359	0.150396	4.94313	9.79687	85.26	0.673289	175.203	1.48432	4.8179	18.399	0.0847569	0.527816	0	201.19	199.904	1.28586	99.3609	1.15917	0.15206	4.90491	1895.88	15.6693	29.9059	120.741	1.25722	7.95848	0
P-05-01-04	42	DNOR	20	40	Ah 3	colluvium	granite	C / S	F, M / A / W	SB, GR / ME, FI	F / N	10YR 3/3	48	33.181	98	13.362	330	1893	23	3	1.43787	1.27012	6.96954	0	11.0016	12.2484	76.75	0.6328	193.333	1.42962	4.62582	29.027	0.220455	0.583932	0	229.852	228.415	1.43719	99.3747	2.39271	0.148436	4.20707	1909.23	13.7729	26.2042	173.838	2.98428	8.03513	0
P-05-01-05	42	DNOR	10	20	Ah 2	colluvium	granite	C / S	F, M / A / W	GR / FI	C / N	10YR 3/3	48	33.181	98	13.362	330	1893	23	3	1.36494	1.2057	5.98816	0	11.2476	14.3624	74.39	0.260382	149.685	1.87709	1.58682	25.9513	0.238691	0.23622	0	179.836	179.1	0.735292	99.5911	2.40838	0.145725	0.821651	701.61	8.5833	4.26653	73.7676	1.53363	1.54281	0
P-05-01-06	42	DNOR	0	10	Ah 1	colluvium	granite	A / S	F / A / W	GR / FI, ME	M / V	10YR 2/3	48	33.181	98	13.362	330	1893	23	8.45036	1.85283	0.58104	5.74428	0.0439449	18.5468	27.9432	53.51	0.295385	314.973	7.30408	0.825427	78.4173	1.87671	0.202504	0	403.895	401.52	2.3746	99.4121	10.4672	0.624936	0.423953	671.494	15.191	1.00943	101.384	5.48444	0.601562	0
P-05-02-01	43	DNOR	95	125	3 Cw/Cc	slope deposit with aeolian sand	granite	- / -	F, M, S, B / A / W, S	SG	N / N	10YR 5/4	48	24.506	98	18.295	17	1912	35	80	45.283	1.5	6.48	0	4.27181	5.10819	90.62	0	46.1584	1.25641	0.467981	5.20523	0.0297364	0.0403268	0	53.1581	53.088	0.0700631	99.8682	0.111432	0.0193127	0	166.494	4.42111	0.96829	11.3862	0.147029	0.202684	0
P-05-02-02	43	DNOR	65	95	3 BC	slope deposit with aeolian sand	granite	G / W	F, M, S, B / A / W, S	SG, SB / VF	V / N	10YR 5/4	48	24.506	98	18.295	17	1912	35	50	28.3019	1.5	6.33497	0	6.06771	8.01229	85.92	0.0719778	46.2126	1.45516	0.522118	9.30231	0.0794118	0.0607018	0	57.7043	57.4922	0.212091	99.6325	0.244807	0.0282697	0.436966	416.725	12.8012	2.70076	50.8709	0.981614	0.762725	0
P-05-02-03	43	DNOR	35	65	2 Bw	colluvium 2	granite	G / W	F, M / A / W	SB, SG / FI	F / N	10YR 4/4	48	24.506	98	18.295	17	1912	35	80	35.9046	1.18934	5.84497	0	11.6184	15.7916	72.59	0.175881	86.0594	1.65629	0.664231	17.7186	0.193051	0.0490388	0	106.516	106.099	0.417971	99.6076	0.819824	0.0542773	0.338643	246.128	4.62118	1.08971	30.7314	0.756837	0.195426	0
P-05-02-04	43	DNOR	8	35	Ah2	colluvium	granite	C / W	F / A / W	SB / ME, CO	C / N	10YR 3/2	48	24.506	98	18.295	17	1912	35	50	21.3011	1.12896	5.15497	0	15.1427	17.8473	67.01	0.235371	98.7428	2.34922	0.517454	13.8251	0.386174	0.125544	0	116.182	115.435	0.747089	99.357	1.37768	0.0874201	0.967902	603.148	13.9989	1.81309	51.2124	3.23346	1.06855	0
P-05-02-05	43	DNOR	0	8	Ah	colluvium	granite	A / W	F / A / W	GR / VF, FI	M / V	10YR 2/2	48	24.506	98	18.295	17	1912	35	2.15268	0.327142	0.40272	5.13497	0	19.2857	53.1743	27.54	0.461508	360.218	10.2124	0.742337	102.133	8.20506	0.0884212	0	482.061	473.306	8.75499	98.1838	19.5088	1.1	0.392543	455.107	12.5871	0.537995	78.2536	14.2101	0.155662	0
P-06-01-01	44	DWIR	70	100	3 Cw 2	slope deposit solifluction	granite/gneiss	- / -	F-B / F, A / W	SG	V / N	10YR 5/4	48	48.525	98	19.85	320	2093	25.5	70	42.2642	1.6	5.21474	0	6.3314	7.4686	86.2	0.155771	52.1684	1.28272	0.618979	12.3377	0.033783	0.0361703	0	66.6335	66.4078	0.225725	99.6612	0.133431	0.0214029	0.605224	301.076	7.22189	2.04915	43.1808	0.26726	0.29087	0
P-06-01-02	44	DWIR	45	70	2 Cw	slope deposit with aeolian sand	granite/gneiss	G / S	F-B / F, A / W	SG	V / N	10YR 5/4	48	48.525	98	19.85	320	2093	25.5	70	42.2642	1.6	5.21474	0	7.45558	10.5444	82	0.232159	56.1345	0.981675	0.56201	12.8752	0.132081	0.0573629	0	70.975	70.5534	0.421604	99.406	0.354591	0.0262457	0.75168	269.971	4.60582	1.55046	37.5517	0.870755	0.384412	0
P-06-01-03	44	DWIR	26	45	2 BC	slope deposit with aeolian sand	granite/gneiss	G / S	F-S / F, A / W	SG, SB / VF	F / N	10YR 5/4	48	48.525	98	19.85	320	2093	25.5	25	14.1509	1.5	5.20954	0	5.98828	6.62172	87.39	0.432008	35.8285	0.870174	0.248599	7.70092	0.132472	0.0694116	0	45.2821	44.6482	0.633892	98.6001	0.242111	0.0222803	2.49152	306.931	7.27227	1.22164	40.0078	1.55562	0.828557	0
P-06-01-04	44	DWIR	17	26	2 Bw 2	slope deposit with aeolian sand	granite/gneiss	C / W	F, M / A / W	SB, SG / ME	C / V	10YR 4/3	48	48.525	98	19.85	320	2093	25.5	5	2.72736	1.4455	5.04474	0	12.1106	11.5794	76.31	0.202632	64.8025	1.40196	0.34124	14.5737	0.231281	0.0792217	0	81.6325	81.1194	0.513134	99.3714	0.567773	0.0390033	0.675706	320.983	6.77452	0.96957	43.7774	1.57035	0.54678	0
P-06-01-05	44	DWIR	6	17	Bw 1	colluvium	granite/gneiss	A / S	F / A / W	SB, SG / ME, FI	C / V	10YR 3/3	48	48.525	98	19.85	320	2093	25.5	5.64241	2.32075	1.08996	5.03954	0	20.7618	26.9782	52.26	0.205857	110.003	2.18355	0.479905	28.3414	0.5809	0.10351	0	141.899	141.008	0.890267	99.3726	1.48887	0.0927671	0.628364	498.761	9.65833	1.24816	77.9286	3.61039	0.653954	0
P-06-01-06	44	DWIR	0	6	Ah	colluvium	granite/gneiss	A / S	F / AW	GR / FI, ME	M / F	10YR 2/3	48	48.525	98	19.85	320	2093	25.5	1.00228	0.39713	1.05	6.13954	0.0471775	26.3084	28.4716	45.22	0.0268703	368.34	22.6734	0.284431	99.1239	5.76421	0.0571197	0	496.27	490.422	5.8482	98.8216	14.1687	1.0458	0.0452172	920.706	55.2893	0.407829	150.259	19.7505	0.198946	0
P-06-02-01	45	DNOR	60	90	2 Cw	slope deposit with aeolian sand	granite/gneiss	- / -	F-B / F, A / W	SG	V / N	10YR 5/4	48	48.371	98	19.351	324	2059	23	50	30.1887	1.6	5.49497	0	4.85262	5.19738	89.95	0.160396	41.1788	1.23053	0.437101	8.37196	0.047268	0.0531967	0	51.4792	51.2184	0.26086	99.4933	0.16972	0.0202671	1.03865	396.087	11.5468	2.41173	48.8353	0.623234	0.712985	0
P-06-02-02	45	DNOR	30	60	2 Cw	slope deposit with aeolian sand	granite/gneiss	- / -	F-B / F, A / W	SG	V / N	10YR 5/4	48	48.371	98	19.351	324	2059	23	50	30.1887	1.6	5.45954	0.00894406	3.25223	2.54777	94.2	0.30825	23.9222	1.16005	0.151815	5.29569	0.0504232	0.0585998	0	30.9471	30.5298	0.417273	98.6517	0.113547	0.0149109	1.99609	230.101	10.8854	0.837649	30.8908	0.664836	0.785401	0
P-06-02-03	45	DNOR	20	30	Bw 2	colluvium	granite/gneiss	G / W	F, M / A / W	SB, SG / FI	F / N	10YR 5/4	48	48.371	98	19.351	324	2059	23	8	4.5283	1.5	4.96954	0	3.7765	4.5235	91.7	0.759001	27.1429	1.60173	0.178325	7.87241	0.062814	0.140766	0	37.758	36.7954	0.96258	97.4507	0.461287	0.0303929	2.8261	150.121	8.64223	0.565752	26.4048	0.476221	1.08483	0
P-06-02-04	45	DNOR	4	20	Bw 1	colluvium	granite/gneiss	C / S	F, M / A / W	SB, GR / ME, FI	C / N	10YR 3/4	48	48.371	98	19.351	324	2059	23	2.1926	1.17057	1.41476	4.63474	0	12.1784	10.3616	77.46	0.818259	57.5859	2.92924	0.225626	20.9221	0.0983823	0.285757	0	82.8652	81.6628	1.2024	98.549	0.731064	0.0510056	4.888	510.971	25.3564	1.14841	112.583	1.19664	3.5331	0
P-06-02-05	45	DNOR	0	4	Ah	colluvium	granite/gneiss	C / W	F / A / W	GR / FI, ME	C / V	10YR 2/2	48	48.371	98	19.351	324	2059	23	4.66888	1.84993	1.05	7.04267	0.219737	14.6307	22.5393	62.83	0	228.649	11.1643	0.285177	55.3314	0.538963	0.0364756	0	296.005	295.43	0.575438	99.8056	4.7802	0.298166	0	366.909	17.4773	0.262502	53.8458	1.18554	0.0815589	0
P-06-03-01	46	DNOR	75	105	3 Cw 2	slope deposit solifluction	granite/gneiss	- / -	F-B / A / W	SG	V / N	10YR 5/4	48	48.4	98	19.136	330	2002	28	60	36.2264	1.6	4.66988	0	5.04304	3.08696	91.87	0.472048	33.7276	1.065	0.372552	7.15923	0.02363	0.0704968	0	42.8906	42.3244	0.566175	98.68	0.160026	0.020877	2.44542	259.533	7.99485	1.64446	33.409	0.249251	0.755884	0
P-06-03-02	46	DNOR	45	75	2 Cw	slope deposit with aeolian sand	granite/gneiss	G / S	F-B / A / W	SG	V / N	10YR 5/4	48	48.4	98	19.136	330	2002	28	60	36.2264	1.6	4.32474	0	3.93653	3.21347	92.85	1.29803	19.4547	1.29122	0.320039	4.26078	0.0788798	0.123028	0.183893	27.0106	25.3268	1.68383	93.766	0.181747	0.019639	6.72439	149.704	9.693	1.41267	19.8832	0.832032	1.31914	0.0355899
P-06-03-03	46	DNOR	30	45	2 BC	slope deposit with aeolian sand	granite/gneiss	G / S	F-S / A / W	SG, SB / VF	F / N	10YR 5/4	48	48.4	98	19.136	330	2002	28	8.58503	4.85945	1.5	4.42954	0	2.53855	2.11145	95.35	2.06209	13.4633	1.38027	0.182192	3.41596	0.0570977	0.260716	0.0571168	20.8788	18.4418	2.43702	88.3278	0.35689	0.0260628	11.4439	110.984	11.1	0.861518	17.0769	0.645195	2.99469	0.011842
P-06-03-04	46	DNOR	18	30	Bw 2	colluvium	granite/gneiss	G / S	F / A / W	SB, SG / FI, ME	C / N	10YR 4/4	48	48.4	98	19.136	330	2002	28	3.77373	1.89208	1.32866	4.19954	0	8.00602	5.99398	86	4.43511	24.8131	1.34091	0.257117	7.40942	0.0161895	0.740116	0.411272	39.4232	33.8205	5.60269	85.7884	0.585629	0.0343874	18.3594	152.572	8.04351	0.906892	27.6292	0.136456	6.34122	0.0636032
P-06-03-05	46	DNOR	6	18	Bw 1	colluvium	granite/gneiss	C / W	F / A / W	SB, GR / ME, FI	C / V	10YR 4/3	48	48.4	98	19.136	330	2002	28	1.76874	0.776604	1.16354	4.63954	0	12.7886	13.1314	74.08	1.23686	64.8435	2.0611	0.256701	22.0584	0.314133	0.293653	0	91.0644	89.2197	1.84465	97.9743	1.62966	0.0987815	4.57719	356.439	11.0527	0.809422	73.533	2.367	2.24921	0
P-06-03-06	46	DNOR	0	6	Ah	colluvium	granite/gneiss	C / W	F / A / W	GR / FI, ME	M / V	10YR 2/2	48	48.4	98	19.136	330	2002	28	0.536899	0.212734	1.05	5.85954	0	13.9181	20.6019	65.48	0.11815	207.431	8.73124	0.258888	72.0027	2.04136	0.0985698	0	290.682	288.424	2.25808	99.2232	5.32085	0.375389	0.199758	520.933	21.3913	0.372949	109.66	7.02741	0.34493	0
P-06-04-01	47	DWIR	60	80	3 Cw 2	slope deposit solifluction	granite/gneiss	- / -	F-B / F, A / F, W	SG	V / N	10YR 5/4	48	52.582	98	19.482	315	2006	32.5	95	57.3585	1.6	5.87988	0	10.0697	7.0103	82.92	0.27085	98.8979	2.71292	0.607935	15.7636	0.20279	0.0661564	0	118.522	117.982	0.539797	99.5446	1.08359	0.0551086	0.116927	63.4181	1.69713	0.223621	6.13014	0.178254	0.0591121	0
P-06-04-02	47	DWIR	40	60	3 Cw 2	slope deposit solifluction	granite/gneiss	- / -	F-B / F, A / F, W	SG	F / N	10YR 5/4	48	52.582	98	19.482	315	2006	32.5	95	57.3585	1.6	4.73474	0	11.4218	12.3282	76.25	3.09679	62.8254	2.58932	4.69555	16.4407	0.244822	0.381941	0	90.2746	86.551	3.72355	95.8753	0.687263	0.0405144	1.3369	40.2867	1.61981	1.7272	6.39346	0.2152	0.341272	0
P-06-04-03	47	DWIR	25	40	2 Bw 2	slope deposit with aeolian sand	granite/gneiss	C / S	F-S / A / W	SG, SB / FI	F / N	10YR 5/4	48	52.582	98	19.482	315	2006	32.5	30	16.9811	1.5	4.46428	0	8.9748	7.8152	83.21	2.3251	40.9737	1.60722	0.403458	10.9766	0.180834	0.197287	0	56.6642	53.961	2.70322	95.2294	0.472932	0.0297974	9.88072	258.638	9.89725	1.46088	42.0189	1.56471	1.73525	0
P-06-04-04	47	DWIR	8	25	Bw 1	colluvium	granite/gneiss	C / W	F, M / A / W	GR, SB / FI, ME	C / V	10YR 3/3	48	52.582	98	19.482	315	2006	32.5	3.99081	1.52	1.00932	4.39474	0	19.0143	18.5657	62.42	1.83656	88.2489	2.95723	0.367411	24.4017	0.837567	0.242838	0.2829	119.175	115.975	3.19987	97.315	2.04375	0.10674	8.16324	582.648	19.0473	1.39148	97.7028	7.58024	2.23404	0.0469769
P-06-04-05	47	DWIR	0	8	Ah	colluvium	granite/gneiss	C / W	- / - / -	GR / FI, ME	M / V	10YR 2/2	48	52.582	98	19.482	315	2006	32.5	7.3534	2.91361	1.05	5.07954	0	20.1485	27.2915	52.56	0.0975659	270.462	11.3279	0.459785	76.832	4.44033	0.0702169	0	363.69	359.082	4.60812	98.733	12.0423	0.600413	0.204867	843.57	34.468	0.822618	145.327	18.9844	0.305165	0
P-07-01-01	48	STE	100	130	5 Ck 3	moraine	granite	- / -	F-S / A / F, W	SB / VF	N / N	10YR 6/3	48	16.462	98	21.224	305	2045	3	75	45.283	1.6	7.64954	1.97109	15.3148	22.0152	62.67	0	353.488	4.12119	0.993445	15.6864	0.0221247	0.00915742	0	374.321	374.289	0.0312821	99.9916	0.272165	0.0227411	0	1700.05	19.3358	2.74069	45.751	0.145859	0.0613675	0
P-07-01-02	48	STE	75	100	4 Ck 2	slope deposit 3 with aeolian silt	granite	G / W	F, M / A / W	AB / VF	N / N	10YR7/3	48	16.462	98	21.224	305	2045	3	5	3.01887	1.6	7.76954	7.09412	18.9098	36.5902	44.5	0	466.852	4.58517	0.942346	21.87	0.012297	0.00298347	0	494.265	494.249	0.0152804	99.9969	0.366314	0.0269809	0	7109.99	68.1235	8.23245	201.989	0.256717	0.0633124	0
P-07-01-03	48	STE	55	75	3 Ck 1	slope deposit 2 with aeolian silt	granite	C / W	F, M / A / W	AB / VF	V / N	10YR7/3	48	16.462	98	21.224	305	2045	3	15	9.0566	1.6	7.97896	14.2943	21.8178	34.3122	43.87	0	479.631	3.00502	0.738908	18.3308	0.0276436	0.0175048	0	501.751	501.706	0.0451484	99.991	0.581035	0.0425947	0	5228.57	31.9576	4.62056	121.184	0.413082	0.265895	0
P-07-01-04	48	STE	40	55	3 BC	slope deposit 2 with aeolian silt	granite	C / W	F, M / A / W	AB / VF	V / N	10YR 6/3	48	16.462	98	21.224	305	2045	3	15	9.0566	1.6	7.90359	10.2966	15.9386	28.3614	55.7	0	439.701	2.67484	1.03886	16.7811	0.0558524	0.0724834	0	460.325	460.196	0.128336	99.9721	0.687762	0.0537539	0	3594.96	21.3346	4.87219	83.2044	0.625957	0.825758	0
P-07-01-05	48	STE	20	40	3 Bw	slope deposit 2 with aeolian silt	granite	A / W	F, M / A / W	SB / FI, ME	F / N	10YR 4/4	48	16.462	98	21.224	305	2045	3	15	8.49057	1.5	5.92359	0	15.3819	26.9381	57.68	0.588065	120.552	4.06647	0.942872	23.5179	0.0687672	0.120835	0	149.857	149.08	0.777667	99.4811	1.45479	0.129814	4.04605	1232.03	40.5429	5.52749	145.758	0.963372	1.72075	0
P-07-01-06	48	STE	13	20	2 Ah 2	slope deposit with aeolian silt	granite	C / S	F / A / W	SB / FI, ME	C / V	10YR 2/2	48	16.462	98	21.224	305	2045	3	8	3.92453	1.3	5.07896	0	17.3109	24.8291	57.86	0.947841	131.804	5.72569	0.698751	29.9333	0.0680215	0.126882	0	169.305	168.162	1.14274	99.325	3.47051	0.31162	2.14107	442.247	18.742	1.34489	60.9088	0.312859	0.593216	0
P-07-01-07	48	STE	0	13	Ah 1	slope deposit with aeolian sand	granite	C / S	F / A / W	SB, GR / FI	M / F	10YR 2/2	48	16.462	98	21.224	305	2045	3	5.07481	2.48953	1.3	5.40896	0	19.2386	25.8714	54.89	0.187583	246.731	11.957	0.238214	48.429	1.22617	0.0851034	0	308.854	307.356	1.49886	99.5147	9.30778	0.839463	0.811947	1586.35	74.9979	0.87856	188.829	10.8067	0.762429	0
P-07-02-01	49	DWIR	70	90	3 Cw	slope deposit solifluction	granite	- / -	F-B / F, A / W	SG	V / N	10YR 5/3	48	16.438	98	20.856	325	2043	26.5	60	33.9623	1.5	4.71816	0	2.32847	8.11153	89.56	0.889436	14.5623	0.621756	0.103666	2.99534	0.022665	0.0512627	0	19.2464	18.2831	0.963364	94.9946	0.0515556	0.021738	2.8798	70.0354	2.91715	0.285991	8.7362	0.14942	0.343532	0
P-07-02-02	49	DWIR	45	70	3 Cw	slope deposit solifluction	granite	- / -	F-B / F, A / W	SG	F / N	10YR 5/3	48	16.438	98	20.856	325	2043	26.5	60	33.9623	1.5	4.33359	0.219889	2.62511	7.13489	90.24	1.74852	18.6501	0.951369	0.237229	4.54363	0.0402638	0.0888021	0.32929	26.5892	24.3823	2.20688	91.7001	0.0795333	0.020833	7.07667	112.119	5.57953	0.818077	16.5649	0.331802	0.743873	0.0497887
P-07-02-03	49	DWIR	27	45	2 BC	slope deposit 2 with aeolian silt	granite	C / W	F, M, S / A / W	SB, SG / VF	F / N	10YR 5/4	48	16.438	98	20.856	325	2043	26.5	5	2.83019	1.5	4.28954	0	12.7136	26.9664	60.32	2.96309	40.5492	2.14657	0.479033	12.7638	0.106076	0.246179	0.305359	59.5593	55.9386	3.62071	93.9208	0.367619	0.0274087	20.5069	416.846	21.5274	2.8248	79.5725	1.49479	3.52633	0.0789511
P-07-02-04	49	DWIR	6	27	Bw	slope deposit with aeolian silt	granite	C / W	F, M, S / A / W	SB, GR / ME, VF	C / F	10YR 4/3	48	16.438	98	20.856	325	2043	26.5	10	4.90566	1.3	4.46954	0	12.3699	16.0901	71.54	1.29765	41.9262	2.05436	0.239525	14.6369	0.128809	0.163834	0.140461	60.5878	58.857	1.73075	97.1434	0.529161	0.042055	8.60259	412.855	19.7351	1.35298	87.4077	1.7387	2.24799	0.0347874
P-07-02-05	49	DWIR	0	6	Ah	slope deposit with aeolian silt	granite	A / S	- / - / -	GR / ME	M / C	10YR 2/2	48	16.438	98	20.856	325	2043	26.5	0.965987	0.437428	1.2	5.23954	0	22.6027	43.2573	34.14	1.1517	169.897	6.79401	3.10493	38.0267	3.5326	0.289672	0	222.796	217.822	4.97397	97.7675	5.74149	0.360401	2.21577	485.521	18.9409	5.08983	65.9023	13.8383	1.15347	0
P-08-01-01	50	DWIR	85	105	4 CW	slope deposit solifluction	granite	- / -	F-B / A / W	MA, SG	N / N	10YR 5/2	48	22.427	98	38.329	357	2039	23	90	50.9434	1.5	4.75	0	5.09447	6.87553	88.03	0	31.8549	0.967396	0.956012	9.32741	0.191506	0.0104025	0.0444047	43.3521	43.1057	0.246313	99.4318	0.220208	0.024175	0	38.3005	1.13471	0.659355	6.80108	0.315629	0.0174278	0.0013428
P-08-01-02	50	DWIR	65	85	4 CW	slope deposit solifluction	granite	- / -	F-B / A / W	MA, SG	N / N	10YR 5/2	48	22.427	98	38.329	357	2039	23	90	50.9434	1.5	5.00497	0	11.8458	11.7242	76.43	0.187322	63.3468	2.21942	0.635375	17.9456	0.525711	0.0570235	0	84.9172	84.1472	0.770057	99.0932	1.18779	0.0660404	0.151627	76.1643	2.60326	0.438215	13.0851	0.866446	0.0955344	0
P-08-01-03	50	DWIR	37	65	4 BC	slope deposit solifluction	granite	G / S	F-S / A / W	MA, SG	V / N	10YR 4/4	48	22.427	98	38.329	357	2039	23	50	28.3019	1.5	4.69474	0	8.61101	19.059	72.33	0.126058	30.8223	1.4103	0.528885	10.0491	0.203074	0.0118342	0	43.1516	42.8106	0.340966	99.2098	0.16084	0.0203347	0.71426	259.412	11.5795	2.55338	51.291	2.34286	0.138785	0
P-08-01-04	50	DWIR	27	37	2 Bw 2/ 3 Bw 3	slope deposit with aeolian silt and sand	granite	A / S	F, M / A / W	SG	F / N	10YR 4/2	48	22.427	98	38.329	357	2039	23	17.2308	8.45282	1.3	4.73	0	19.7452	33.4748	46.78	0.892955	89.9616	3.12086	0.840845	27.5826	1.17219	0.0997633	0.0602614	123.731	121.506	2.22517	98.2016	1.77267	0.107647	2.59244	387.95	13.1294	2.08	72.1346	6.9292	0.59947	0.006536
P-08-01-05	50	DWIR	17	27	2 Bw	slope deposit with aeolian silt	granite	A / W	F / A / W	SG, GR / FI	C / N	10YR 3/2	48	22.427	98	38.329	357	2039	23	1.60867	0.513863	0.8465	4.61988	0	27.2645	43.3855	29.35	1.76519	145.058	4.70716	1.17096	38.3129	1.2426	0.649081	0.302049	193.208	189.249	3.95892	97.951	4.03062	0.233888	3.9668	484.209	15.3285	2.24213	77.5576	5.68577	3.01903	0.0253584
P-08-01-06	50	DWIR	11	17	2 Ah	slope deposit with aeolian silt	granite	C / W	F / A / W	AG, GR / ME, FI	C / V	10YR 3/3	48	22.427	98	38.329	357	2039	23	1.27241	0.624203	1.3	4.85474	0	27.5753	42.8147	29.61	0.530417	174.535	4.49181	1.38294	48.21	3.00331	0.0441306	0	232.197	228.619	3.57786	98.4591	4.41153	0.286118	1.10209	538.667	13.5242	2.44834	90.233	12.7059	0.189783	0
P-08-01-08	50	DWIR	0	6	Ah/C	slope deposit after fire	granite	A / w	F / AW	AG, GR / ME, FI	C / N	10YR 3/2	48	22.427	98	38.329	357	2039	23	9.54938	3.78372	1.05	5.12988	0	16.4183	36.3917	47.19	0.141919	107.346	5.4301	0.444615	34.7459	1.71291	0.0541834	0	149.876	147.967	1.90901	98.7263	3.51998	0.211353	0.218201	245.157	12.0981	0.582467	48.1229	5.36239	0.172426	0
P-08-02-01	51	DNOR	80	110	5 CW	slope deposit solifluction	granite	- / -	F-B / A / W	SG, MA	V / N	10YR 4/4	48	22.293	98	38.313	4	2098	34	75	42.4528	1.5	4.58474	0	5.32401	9.09599	85.58	0.306461	19.0217	1.13636	0.504543	6.21757	0.0502438	0.024137	0.108338	27.3694	26.8802	0.48918	98.2127	0.0603422	0.0188037	0.930238	85.7648	4.99835	1.30493	17.0008	0.310533	0.151642	0.0122855
P-08-02-02	51	DNOR	51	80	5 CW	slope deposit solifluction	granite	- / -	F-B / A / W	SG, MA	V / N	10YR 4/4	48	22.293	98	38.313	4	2098	34	75	42.4528	1.5	4.57474	0	4.98114	6.87886	88.14	0.540711	15.6883	0.95694	0.444777	5.17433	0.0797911	0.066789	0.178449	23.1301	22.2643	0.86574	96.2571	0.0584031	0.0147837	1.58657	68.3771	4.06885	1.11201	13.6766	0.476712	0.405619	0.0195616
P-08-02-03	51	DNOR	41	51	4 BC	slope deposit with aeolian sand	granite	C / W	F, C / A / W	SB, MA / FI	F / N	10YR 4/3	48	22.293	98	38.313	4	2098	34	44.0216	21.5955	1.3	4.37497	0	8.52615	21.3239	70.15	0.685548	21.0326	1.28874	0.466583	7.8237	0.347653	0.09511	0.318427	32.0584	30.6117	1.44674	95.4872	0.144623	0.0184204	1.34607	61.3428	3.6668	0.780598	13.8379	1.38989	0.386522	0.0233579
P-08-02-04	51	DNOR	26	41	3 AB	slope deposit with aeolian silt	granite	C / W	F, C / A / W	AB / FI	C / N	10YR 3/2	48	22.293	98	38.313	4	2098	34	33.4177	16.3936	1.3	4.63497	0	21.5922	26.5878	51.82	1.35515	110.895	5.44801	0.775436	34.9383	1.50286	0.225146	0.239115	155.379	152.057	3.32227	97.8618	3.68514	0.233007	4.74732	577.048	27.656	2.31459	110.253	10.7197	1.63246	0.031294
P-08-02-05	51	DNOR	20	26	3 Ahb	slope deposit with aeolian silt	granite	C / S	F, M / A / W	AB, SB / FI, ME	C / N	10YR 3/2	48	22.293	98	38.313	4	2098	34	27.0183	10.7053	1.05	4.70497	0	28.137	22.403	49.46	1.06557	97.8242	5.09985	0.65655	35.1108	1.08778	0.305615	0.0765916	141.227	138.691	2.53556	98.2046	2.41255	0.127082	1.32191	180.263	9.1679	0.693998	39.2365	2.7477	0.784719	0.00354974
P-08-02-06	51	DNOR	4	20	Bw 1/2 Bw 2	colluvium	granite	A / S	F, M / A / W	AB, SB / ME	C / F	10YR 3/3	48	22.293	98	38.313	4	2098	34	18.7972	7.89597	1.11316	4.55497	0	17.3884	27.8616	54.75	0.99433	52.69	2.66966	0.499282	21.6023	0.70285	0.229726	0.257076	79.6452	77.4612	2.18398	97.2579	0.986764	0.0586669	3.88012	305.409	15.096	1.66008	75.9354	5.58449	1.85542	0.0374775
P-08-02-07	51	DNOR	0	4	Ah	colluvium	granite	A / S	F / A / W	GR / FI, ME	M / F	10YR 2/3	48	22.293	98	38.313	4	2098	34	2.56598	0.871463	0.9	4.84988	0	32.3768	36.9832	30.64	0.492584	204.587	10.0016	0.709141	67.759	3.25111	0.117838	0	286.918	283.057	3.86153	98.6541	7.7585	0.435768	0.466187	287.606	13.7164	0.571849	57.7665	6.26495	0.230825	0
P-08-03-01	52	DWIR	33	52	2 BC	slope deposit solifluction	granite	G / W	F-B / A / W	SB, SG / FI	F / N	10YR 5/3	48	22.113	98	38.247	355	2213	30.5	70	39.6226	1.5	4.05497	0	11.2752	17.6048	71.12	3.27962	25.1288	1.25449	0.677668	8.88658	0.212554	0.312502	0.801375	40.5536	35.9476	4.60605	88.6421	0.242897	0.0271873	7.56583	86.1082	4.19365	1.33204	18.467	0.998408	1.49212	0.0690657
P-08-03-02	52	DWIR	20	33	2 Bw 2	slope deposit solifluction	granite	G / S	F, M / A / W	SB, MA / ME	C / N	10YR 4/4	48	22.113	98	38.247	355	2213	30.5	26.8349	13.1643	1.3	3.87497	0	13.0709	27.0091	59.92	6.19947	33.4161	1.43782	0.531167	11.2123	0.154984	0.574894	1.58423	55.111	46.5974	8.51358	84.5519	0.525699	0.0439366	20.6829	165.597	6.95109	1.50993	33.6963	1.05281	3.96975	0.197456
P-08-03-03	52	DWIR	5	20	Bw 1	slope deposit with aeolian silt	granite	A / S	F / A / W	GR, SB / FI, ME	C / V	10YR 2/2	48	22.113	98	38.247	355	2213	30.5	7.56332	2.87286	1.00658	3.66497	0	22.6329	39.1071	38.26	14.7906	64.3099	2.06637	0.780715	19.398	0.40131	1.30179	3.14728	106.196	86.555	19.641	81.505	1.9649	0.0986014	55.6976	359.723	11.2759	2.50502	65.8016	3.07707	10.1463	0.442772
P-08-03-04	52	DWIR	0	5	Ah	slope deposit with aeolian silt	granite	A / S	F / A / W	GR / FI, ME	M / V	10YR 1.7/1	48	22.113	98	38.247	355	2213	30.5	5.66975	2.2465	1.05	5.26474	0	27.6803	46.8497	25.47	0.226443	128.081	7.04205	0.957747	33.502	1.83584	0.0217059	0	171.667	169.583	2.08399	98.786	3.50881	0.265783	0.302577	254.215	13.6354	1.09043	40.3252	4.99481	0.0600306	0
P-10-01-01	53	DWIR	65	95	3 C 2	slope deposit solifluction	gneiss	- / -	F-S / F, A / W	SG, MA	V / N	10YR 4/4	48	41.506	98	27.93	290	1934	45	60	33.9623	1.5	6.21497	0	5.3951	15.3849	79.22	0.284839	82.1038	1.37926	1.19504	10.0245	0.12413	0.161839	0	95.2735	94.7027	0.570809	99.4009	0.597236	0.048967	1.38337	592.3	9.70683	4.94526	43.8563	1.22751	1.62682	0
P-10-01-02	53	DWIR	45	65	3 C	slope deposit solifluction	gneiss	G / S	F-S / F, A / W	SG, MA	F / N	10YR 3/4	48	41.506	98	27.93	290	1934	45	75	36.7925	1.3	5.54474	0	5.49785	16.3621	78.14	0.344974	69.7207	3.02762	1.26943	14.1502	0.132331	0.124051	0	88.7694	88.168	0.601356	99.3226	0.822658	0.0547887	0.605015	181.627	7.69436	1.89695	22.3549	0.472549	0.450297	0
P-10-01-03	53	DWIR	25	45	3 C	slope deposit solifluction	gneiss	G / S	F-B / F, A / W, S	SG, MA	F / N	10YR 3/4	48	41.506	98	27.93	290	1934	45	75	36.7925	1.3	5.34474	0	8.31391	18.3461	73.34	0.431177	68.436	7.44218	1.28911	17.4961	0.18214	0.181889	0	95.4586	94.6634	0.795206	99.167	0.94295	0.0605941	0.756197	178.28	18.9135	1.92636	27.6409	0.650418	0.660243	0
P-10-01-04	53	DWIR	16	25	2 Bw 2	slope deposit with aeolian sand	gneiss	C / W	F-S / A / W	SB, SG / FI	C / V	10YR 3/3	48	41.506	98	27.93	290	1934	45	7.49308	3.67585	1.3	5.49474	0	11.7841	18.7659	69.45	0.262469	78.9643	7.72375	1.26559	20.746	0.175275	0.149328	0	109.287	108.7	0.587072	99.4628	1.2431	0.080429	0.766485	342.529	32.6848	3.14912	54.5745	1.04221	0.902582	0
P-10-01-05	53	DWIR	7	16	Bw	slope deposit with aeolian silt	gneiss	C / S	F-S / A / W	SB, SG / FI	C / V	10YR 2/2	48	41.506	98	27.93	290	1934	45	3.3846	1.19074	0.9323	5.65	0	13.3462	27.0638	59.59	0.0354597	116.702	8.10779	1.55962	40.2292	0.399494	0.149075	0	167.182	166.598	0.584029	99.6507	2.67441	0.171957	0.0775615	379.164	25.6983	2.90669	79.265	1.77921	0.674892	0
P-10-01-06	53	DWIR	0	7	Ah	slope deposit with aeolian silt	gneiss	A / W	F / A / W	Gr / FI	C / V	10YR 2/1	48	41.506	98	27.93	290	1934	45	1.94416	0.770328	1.05	7.18474	0	15.77	32.66	51.57	0.386686	270.902	18.7853	2.09958	58.1233	0.758917	0.134635	0	351.191	349.911	1.28024	99.6355	7.45404	0.646684	0.751944	782.492	52.9341	3.47879	101.814	3.00488	0.541881	0
P-10-02-01	54	DWIR	50	75	2 BC	slope deposit with aeolian sand	gneiss	- / -	F, M, S, B / F, A / W	SG, MA	V / V	10YR 5/4	48	41.471	98	28.073	291	2033	44.5	80	39.2453	1.3	5.20988	0	6.1661	14.8539	78.98	0.586556	53.8046	8.37793	0.993426	10.0735	0.143329	0.0988442	0	74.0781	73.2494	0.828729	98.8813	0.628579	0.0512749	1.0287	140.165	21.2916	1.48451	15.9143	0.511825	0.358797	0
P-10-02-02	54	DWIR	20	50	2 Bw	slope deposit with aeolian sand	gneiss	G / W	F-S, B / F, A / W	SB / FI	C / V	10YR 3/3	48	41.471	98	28.073	291	2033	44.5	50	24.5283	1.3	4.85497	0	6.24796	13.642	80.11	1.10457	43.5839	8.30016	0.861455	8.6151	0.245483	0.221167	0	62.9319	61.3607	1.57122	97.5033	0.759937	0.0548467	5.8116	340.618	63.2818	3.86191	40.8311	2.62984	2.40846	0
P-10-02-03	54	DWIR	9	20	Ah 2	slope deposit with aeolian silt	gneiss	C / W	F / A / W	SB / FI, ME	C / V	10YR 2/3	48	41.471	98	28.073	291	2033	44.5	1.56466	0.487348	0.8254	4.77497	0	14.367	24.273	61.36	1.03158	101.482	10.4366	0.560006	21.6782	1.81048	0.170396	0	137.169	134.157	3.01246	97.8038	4.04826	0.314275	2.48759	363.499	36.4691	1.15063	47.0897	8.88946	0.850455	0
P-10-02-04	54	DWIR	0	9	Ah	slope deposit with aeolian silt	gneiss	C / S	- / - / -	GR / FI	C / F	10YR 2/2	48	41.471	98	28.073	291	2033	44.5	0.384695	0.152426	1.05	5.19988	0	16.9561	36.1039	46.94	0.184878	288.157	26.5265	0.695979	115.247	4.0612	0.0574274	0	434.93	430.626	4.3035	99.0105	19.002	1.13303	0.469579	1087.16	97.6327	1.50622	263.684	21.0032	0.301899	0
[truncated: 13 more columns]
