# Supplementary material for: Hydrological soil properties control tree regrowth after forest disturbance in the forest steppe of central Mongolia
Source: Copernicus journal article supplement (doi:10.5194/soil-7-563-2021), 2021-08-30
Supplement: Supplementary file 1 [file soil-7-563-2021-supplement.zip › Figure_S1.pdf]

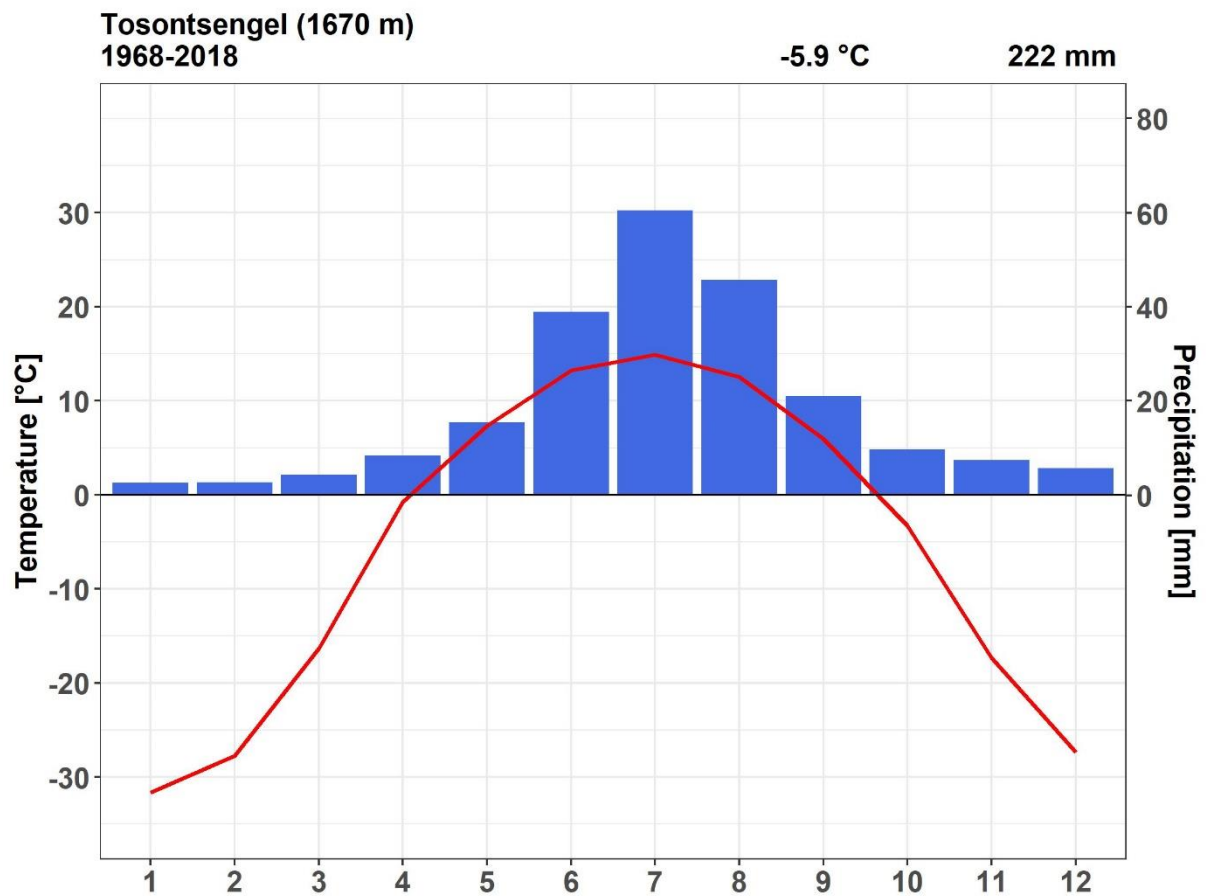

Climate diagram for Tosontsengel, Mongolia (data source: meteorological station of Tosontsengel, Mongolian; National Statistical Office of Mongolia: Mongolian Statistical Information Service, <http://1212.mn/>, last access: 6 November 2019.)
