# Supplementary material for: Hydrological soil properties control tree regrowth after forest disturbance in the forest steppe of central Mongolia
Source: Copernicus journal article supplement (doi:10.5194/soil-7-563-2021), 2021-08-30
Supplement: Supplementary file 1 [file soil-7-563-2021-supplement.zip › soil-7-563-2021-supplement-title-page.pdf]

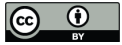

*Supplement of*

## **Hydrological soil properties control tree regrowth after forest disturbance in the forest steppe of central Mongolia**

**Florian Schneider et al.**

*Correspondence to:* Florian Schneider ([florian.schneider@uni-goettingen.de](mailto:florian.schneider@uni-goettingen.de))

- [soil-7-563-2021-supplement-title-page.pdf](#)
- [Figure\\_S1.pdf](#)
- [Table\\_S1.xlsx](#)
- [data.xlsx](#)

The copyright of individual parts of the supplement might differ from the article licence.
