# Supplementary material for: Hydrological soil properties control tree regrowth after forest disturbance in the forest steppe of central Mongolia
Source: Copernicus journal article supplement (doi:10.5194/soil-7-563-2021), 2021-08-30
Supplement: Supplementary file 1 [file Table_S1.xlsx]

## Sheet: Tabelle1
Puplication	Gupta and Larson (1979): Estimating Soil Water Retention Characteristics From Particle Size Distribution, Organic Matter Percent, and Bulk Density	Ostovati et al. (2015): Performance Evaluation of Pedotransfer Functions to Predict Field Capacity and Permanent Wilting Point Using UNSODA and HYPRES Datasets	Ghanbarian-Alavijeh and Millán (2010): Point pedotransfer functions for estimating soil water retention curve
Source	https://citeseerx.ist.psu.edu/viewdoc/download?doi=10.1.1.475.497&rep=rep1&type=pdf	https://www.tandfonline.com/doi/abs/10.1080/15324982.2015.1029649	https://www.researchgate.net/profile/Humberto_Millan/publication/236134790_Point_pedotransfer_functions_for_estimating_soil_water_retention_curve/links/55e45ee908aecb1a7ccae14e/Point-pedotransfer-functions-for-estimating-soil-water-retention-curve.pdf
Correlation (R²) with measured plant-available field capacity, entire data (n = 42)	0.0654041	0.024477	0.00626484
Correlation (R²) with measured plant-available field capacity, all samples with low rock-fragment content (≤ 5.2 %) (n = 22)	0.194597	0.0549745	0.0465775
